# Supplementary material for: The mechanism of Ningxin-Tongyu-Zishen formula regulating proBDNF/mBDNF balance through PAI-1/tPA signaling pathway in the treatment of premature ovarian insufficiency
Source: Research Square preprint supplement (doi:10.21203/rs.3.rs-6810873/v1), 2025-06-19
Supplement: Supplementary file 1 [file a5b1327bc5bff22f7412b1be.docx]

Fig.2C

| proBDNF | mBDNF | The two images can completely coincide and prove to be the same images. |
| --- | --- | --- |
| 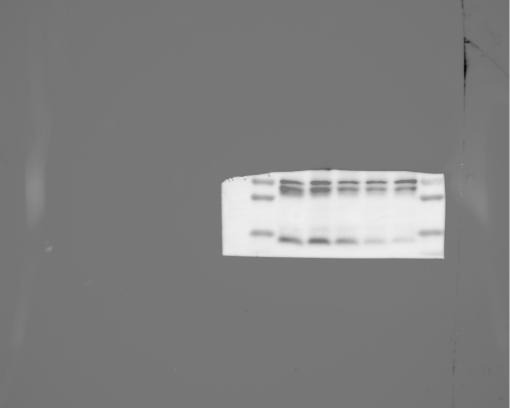 | 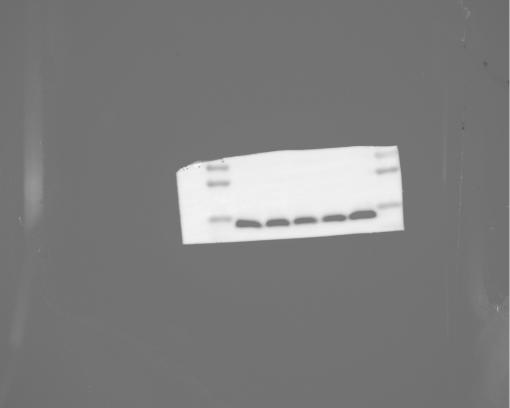 | 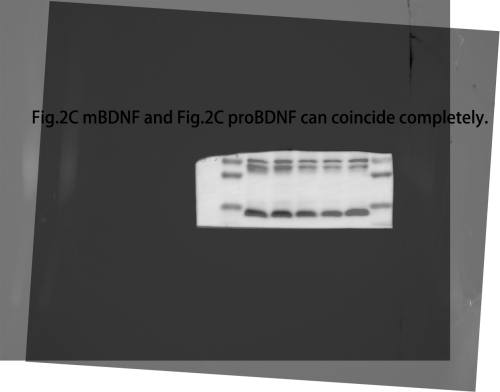 |

Fig.2D

| proBDNF | mBDNF | The markers of the two images can completely coincide and prove to be the same image. |
| --- | --- | --- |
| 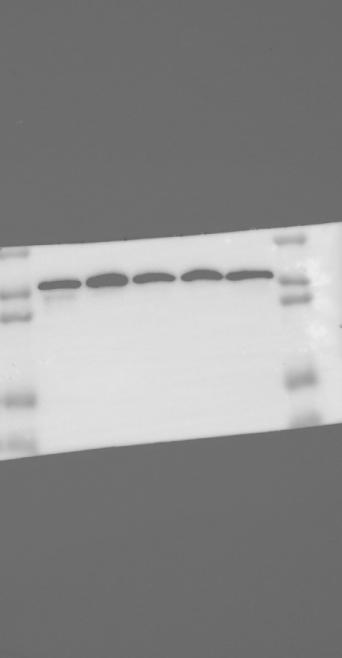 | 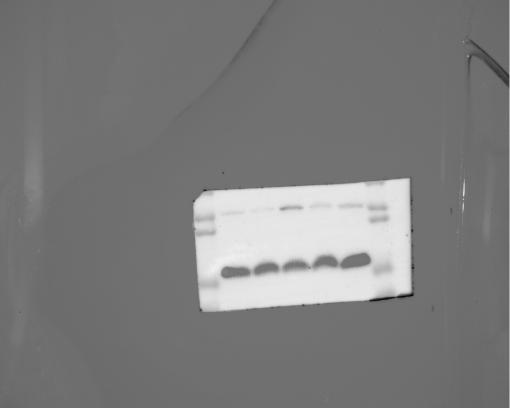 | 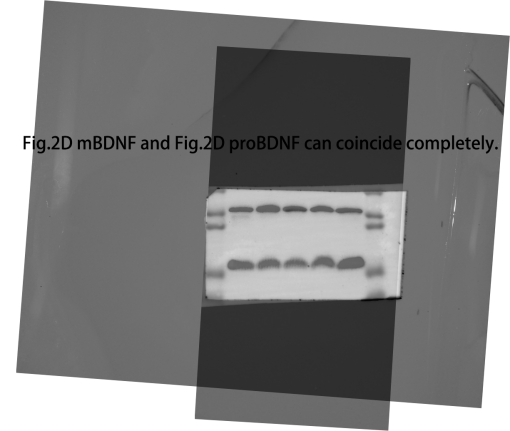 |

Fig.3F＆3G

| p53 | β-actin | p21 | The three iamges can completely coincide and prove to be the same image. |
| --- | --- | --- | --- |
| 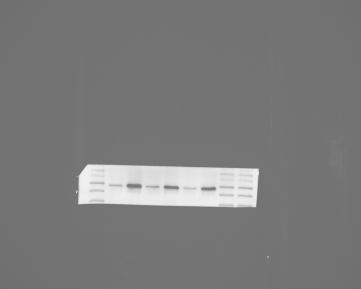 | 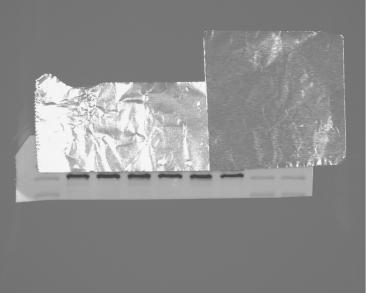 | 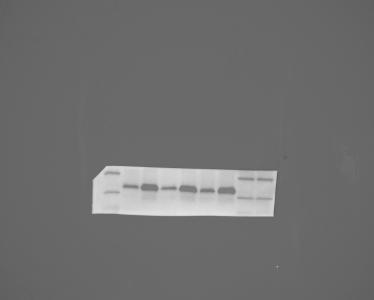 | 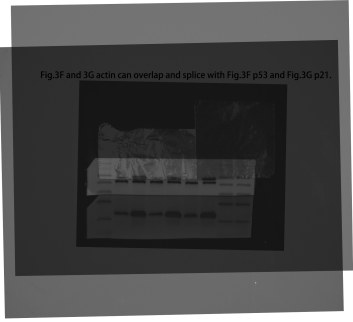 |

Fig.3H

| bax | bcl2 | The two images can completely coincide and prove to be the same images. |
| --- | --- | --- |
| 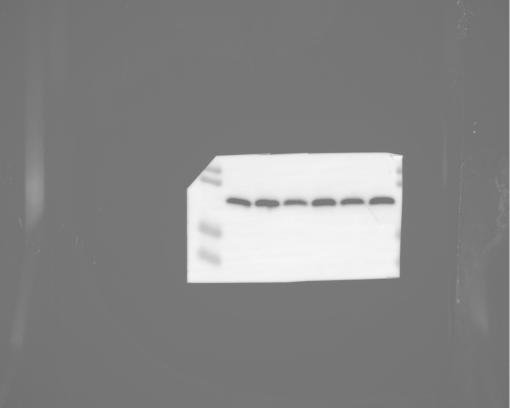 | 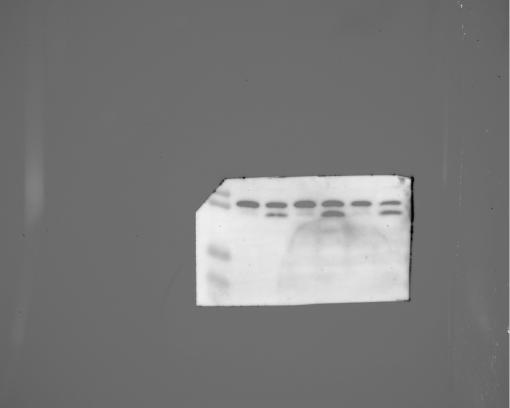 | 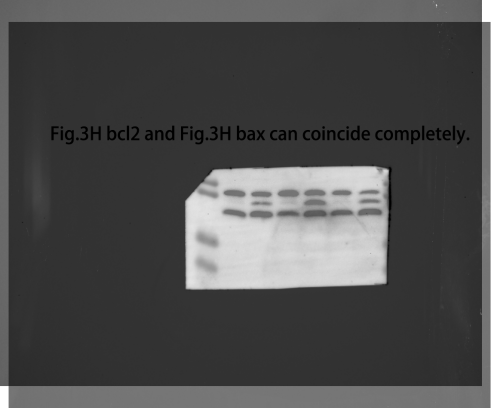 |

Fig.3N

| proBDNF | mBDNF | The markers of the two images can completely coincide and prove to be the same image. |
| --- | --- | --- |
| 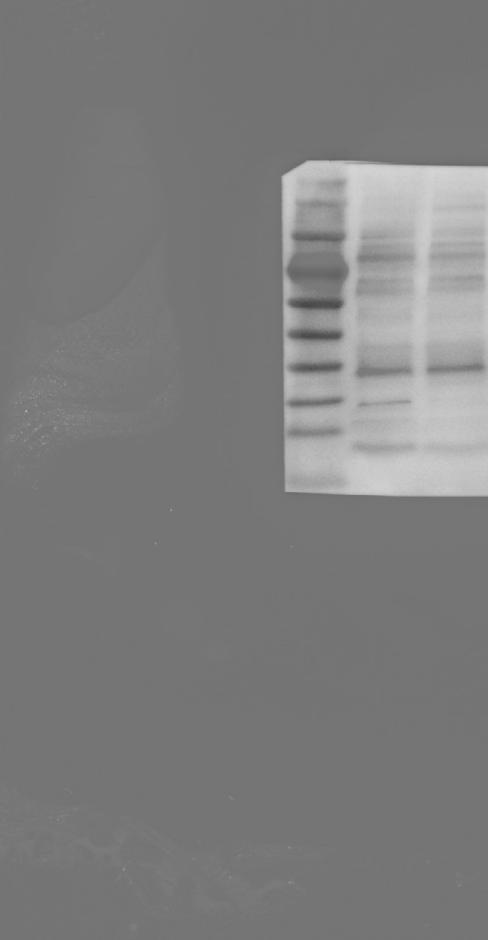 | 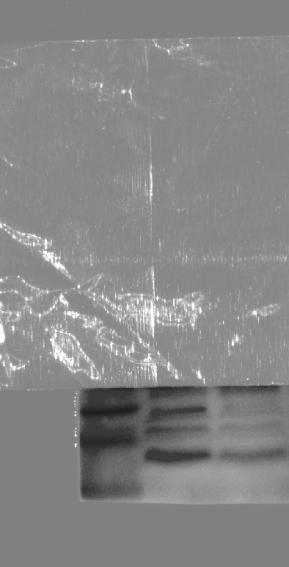 | 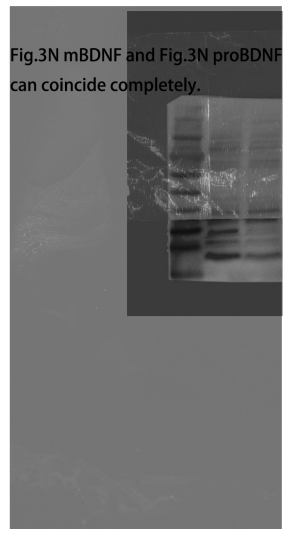 |

Fig.3O

| TrkB | β-actin | The two images can completely coincide and prove to be the same images. | The overall image of the bright field |
| --- | --- | --- | --- |
| 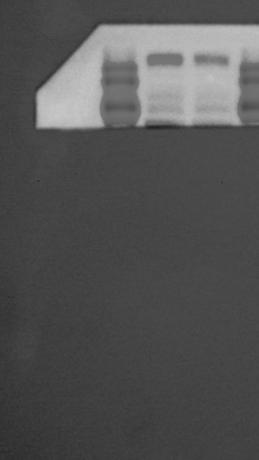 | 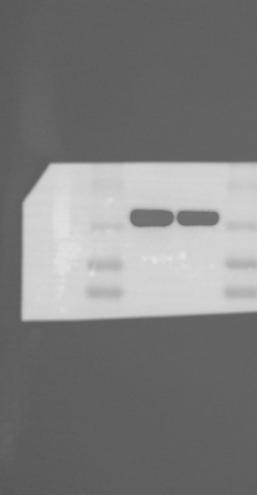 | 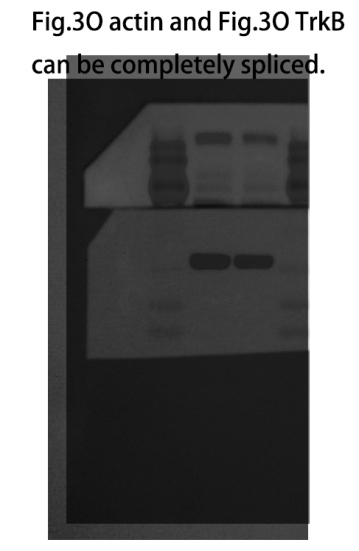 | 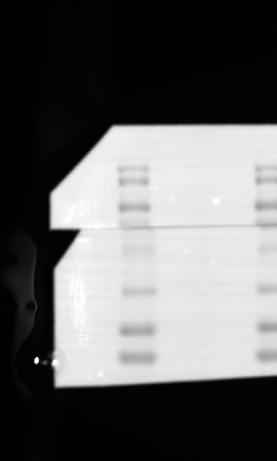 |

Fig.3P

| p75NTR | β-actin | The two images can completely coincide and prove to be the same images. |
| --- | --- | --- |
| 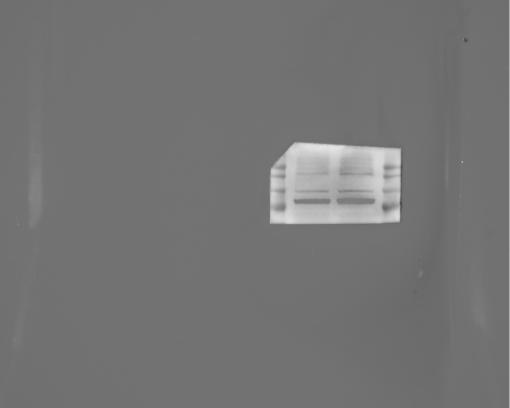 | 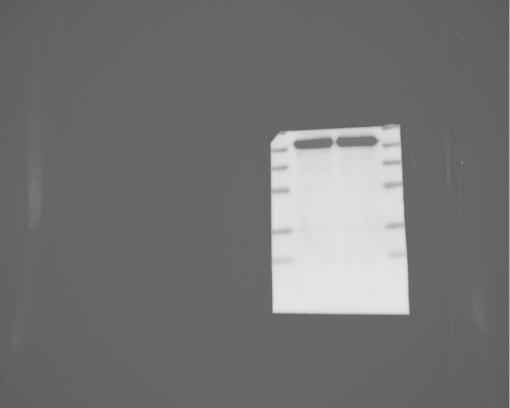 | 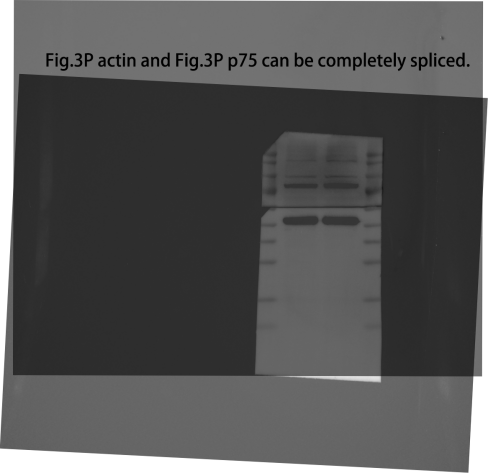 |

Fig.4F

| proBDNF | mBDNF | The markers of the two images can completely coincide and prove to be the same image. |
| --- | --- | --- |
| 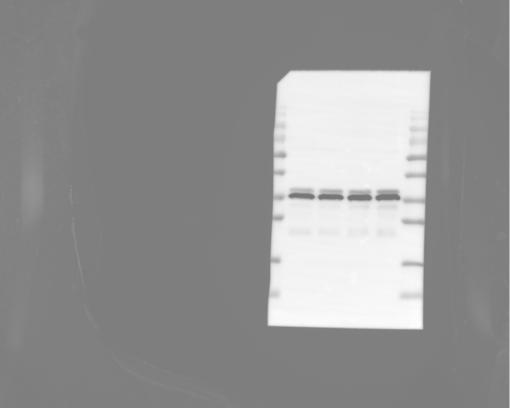 | 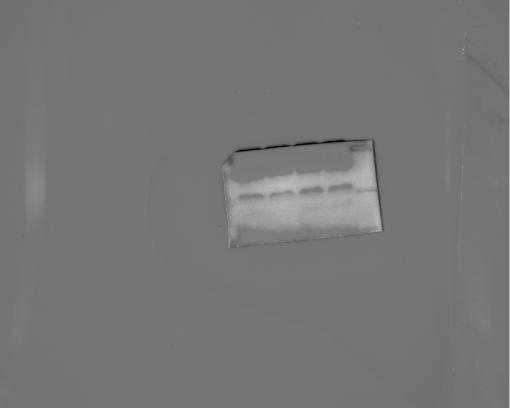 | 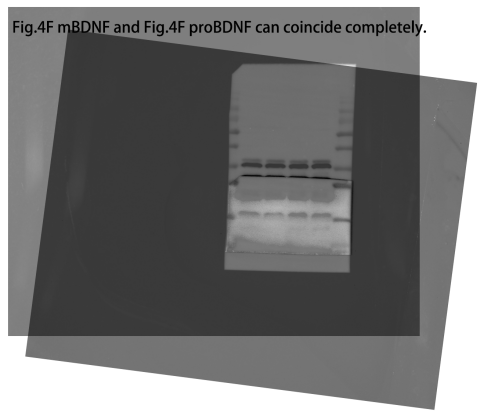 |

Fig.4K

| p53 | β-actin | The markers of the two images can completely coincide and prove to be the same image. |
| --- | --- | --- |
| 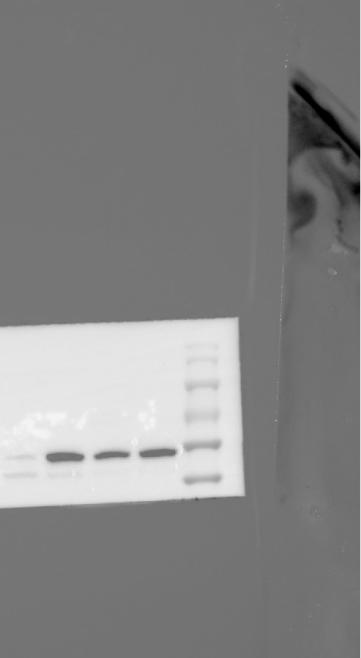 | 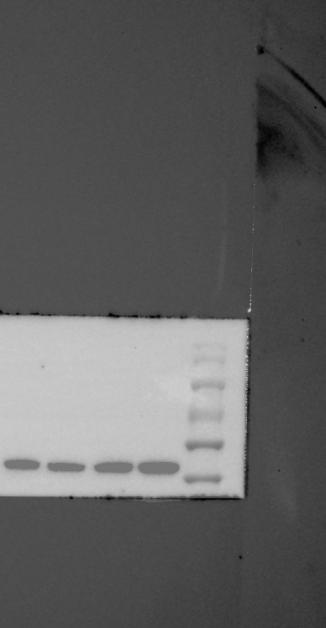 | 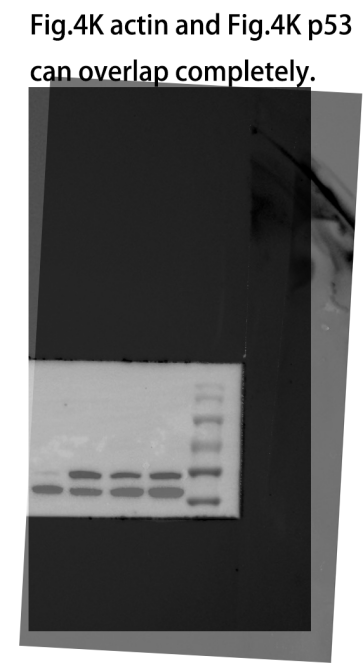 |

Fig.4L

| p21 | β-actin | The two images can completely coincide and prove to be the same images. | The overall image of the bright field |
| --- | --- | --- | --- |
| 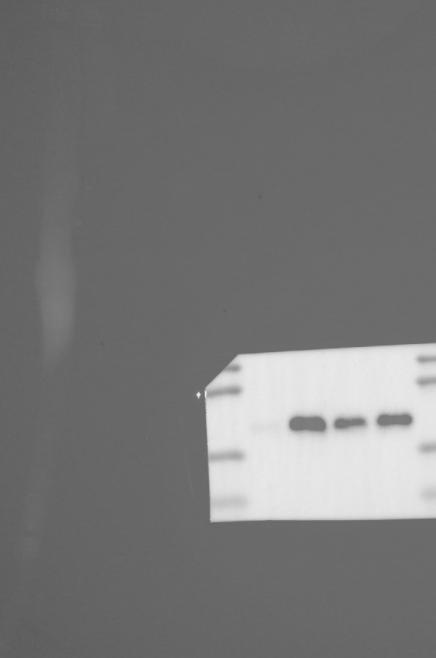 | 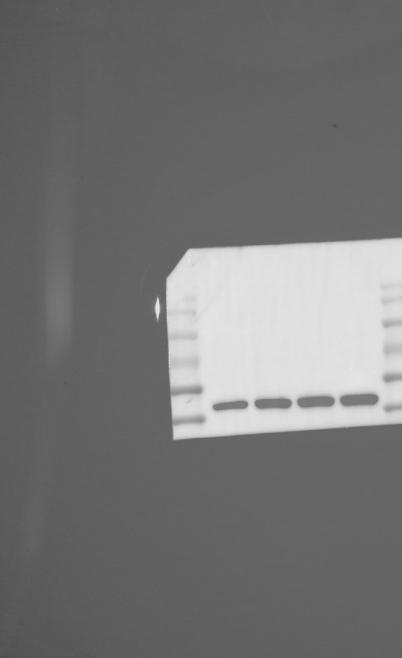 | 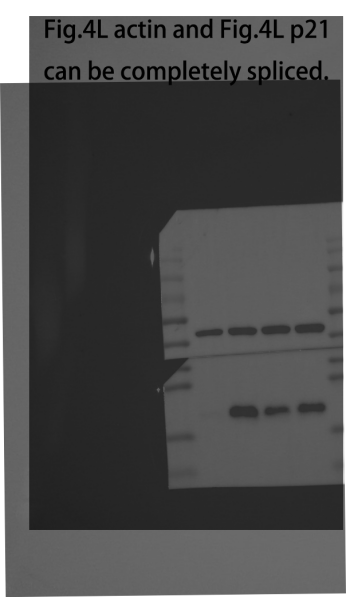 | 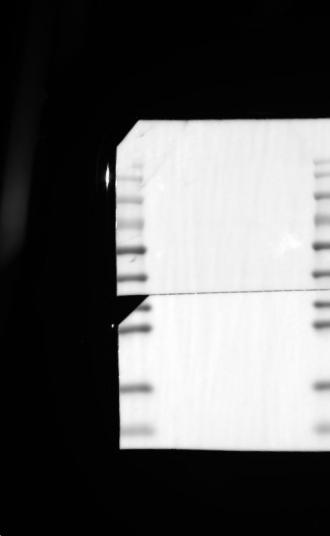 |

Fig.4M

| bax | bcl2 | The markers of the two images can completely coincide and prove to be the same image. |
| --- | --- | --- |
| 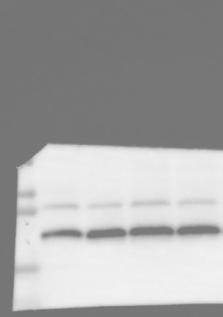 | 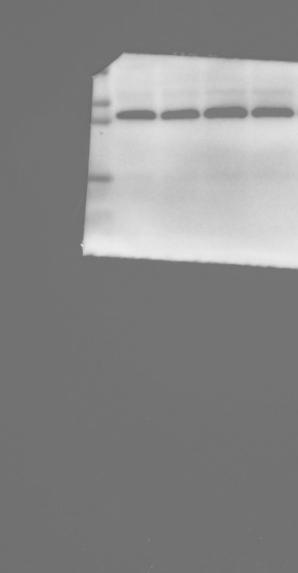 | 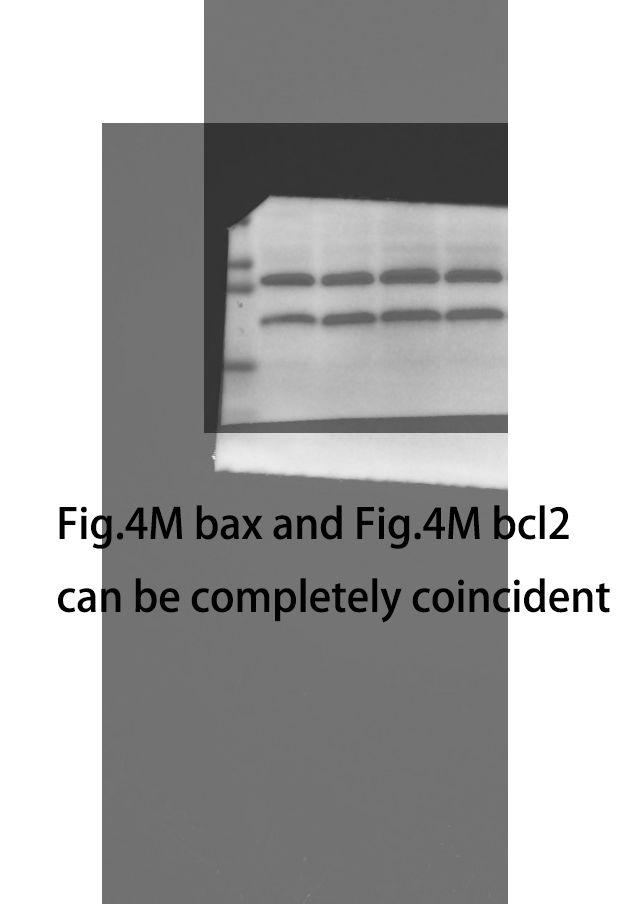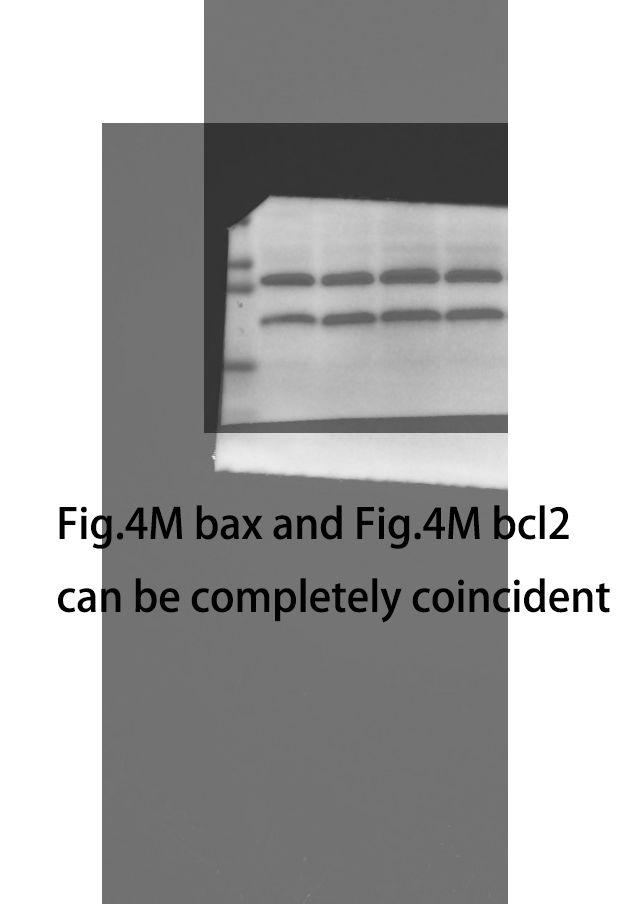 |

Fig.5B

| Furin | β-actin | The two images can completely coincide and prove to be the same images. | The overall image of the bright field |
| --- | --- | --- | --- |
| 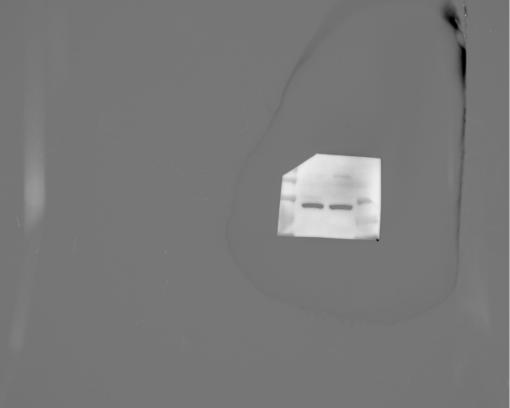 | 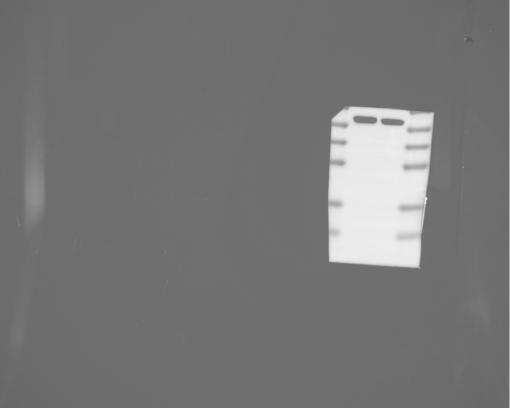 | 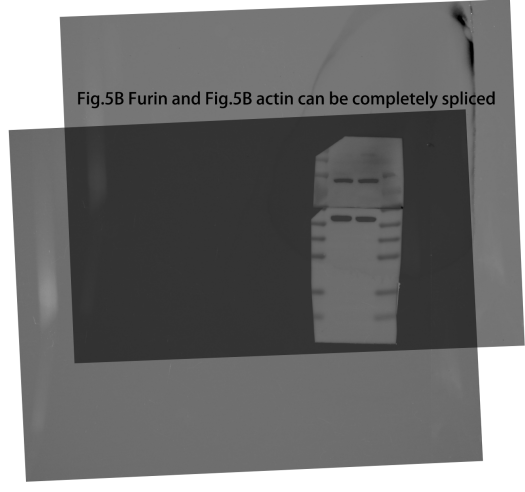 | 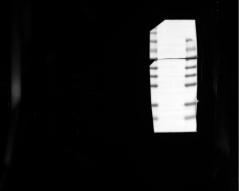 |

Fig.5C

| tPA | β-actin | The markers of the two images can completely coincide and prove to be the same image. |
| --- | --- | --- |
| 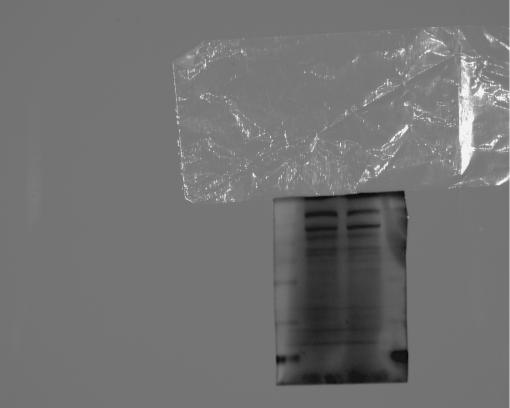 | 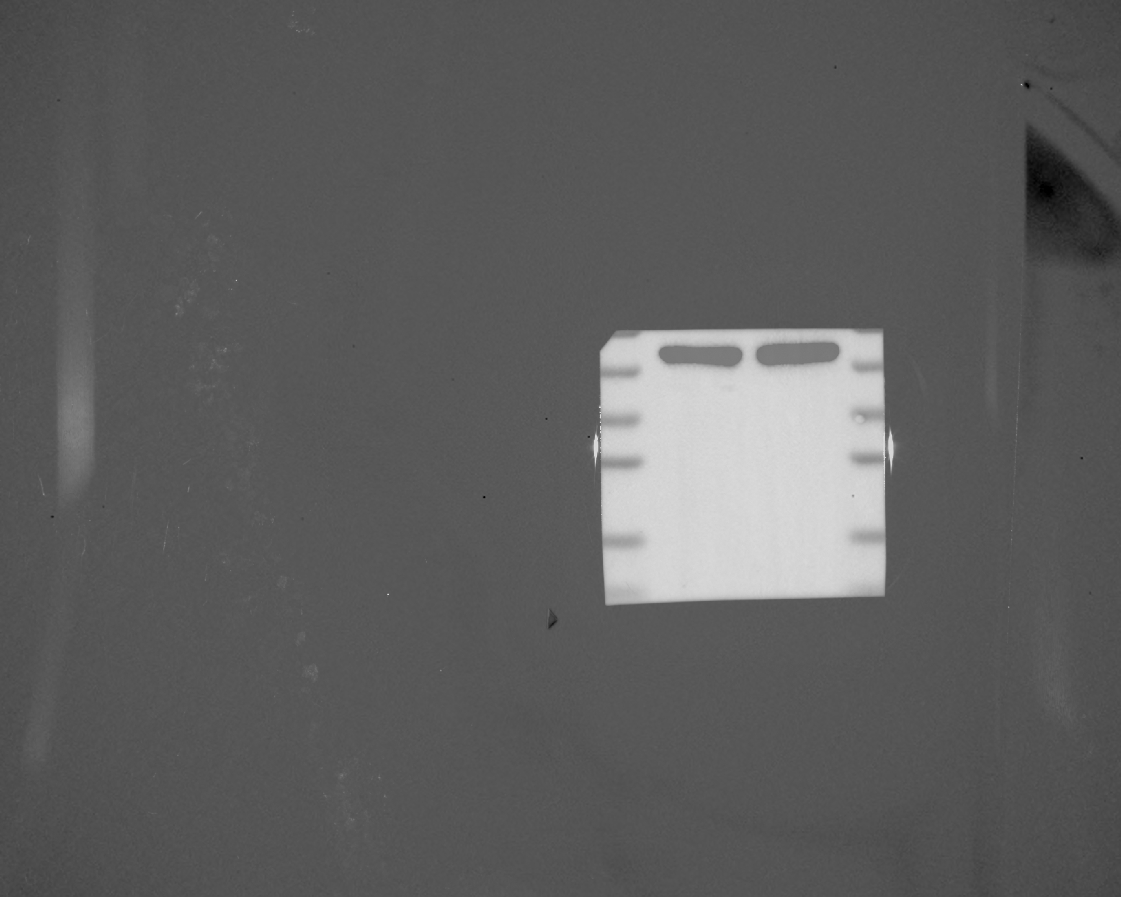 | 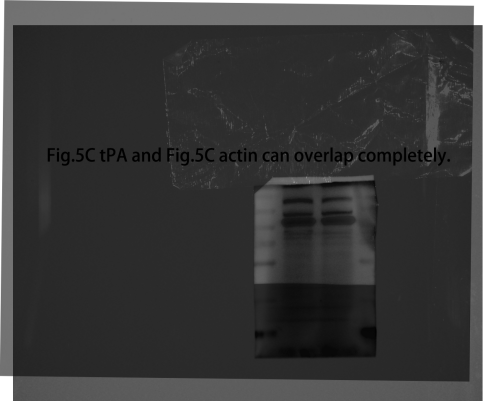 |

Fig.5D

| MMP2 | β-actin | The two images can completely coincide and prove to be the same images. | The overall image of the bright field |
| --- | --- | --- | --- |
| 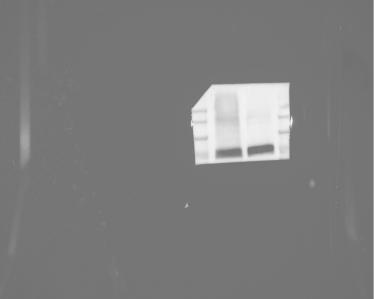 | 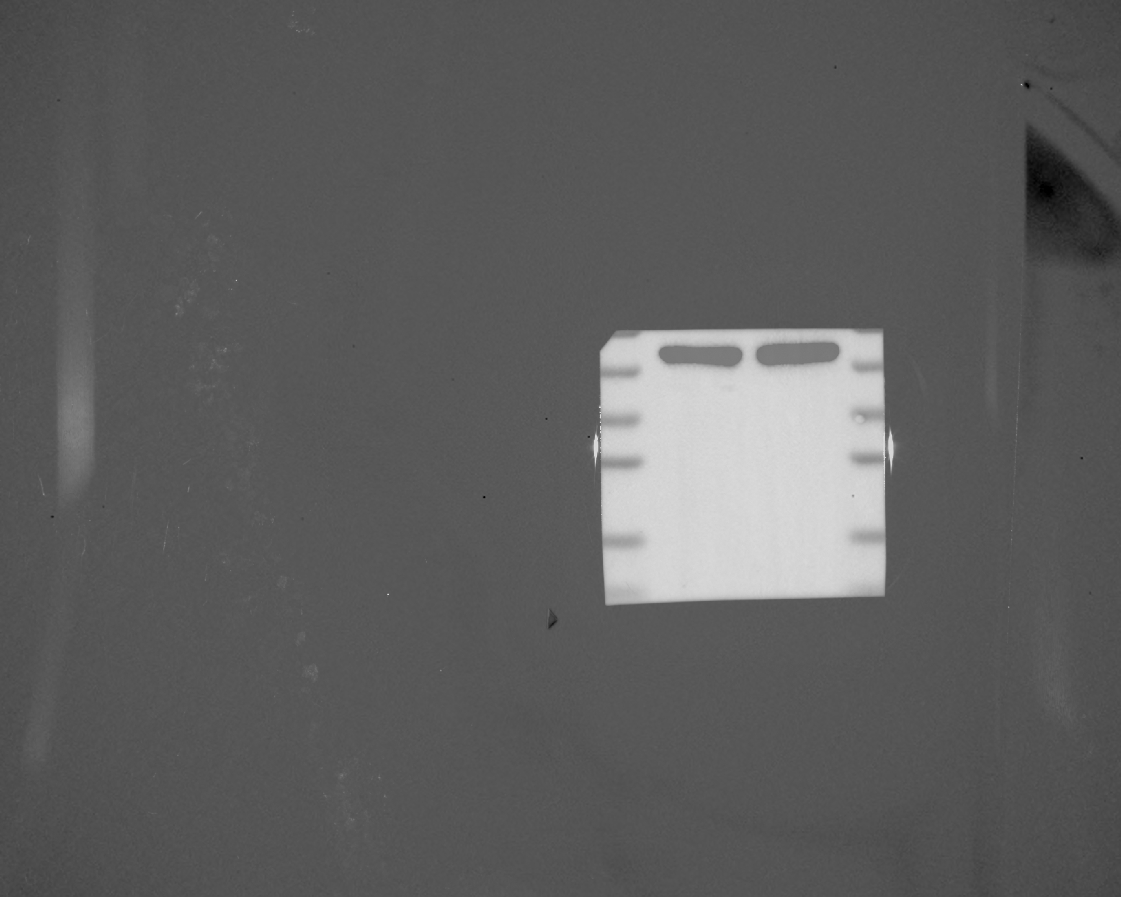 | 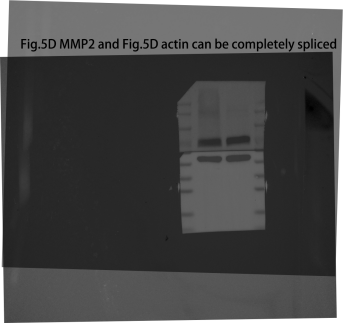 | 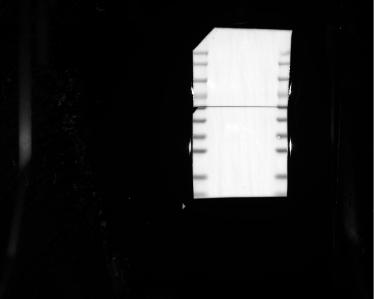 |

Fig.5E

| MMP9 | β-actin | The two images can completely coincide and prove to be the same images. |
| --- | --- | --- |
| 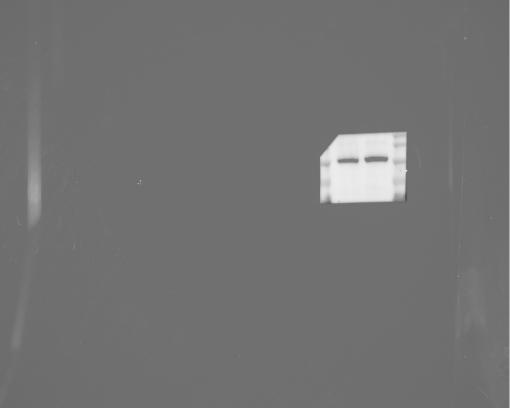 | 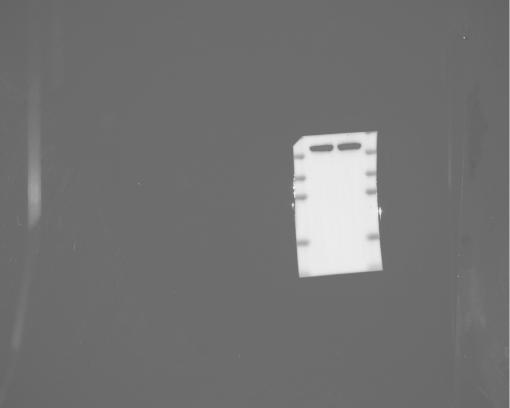 | 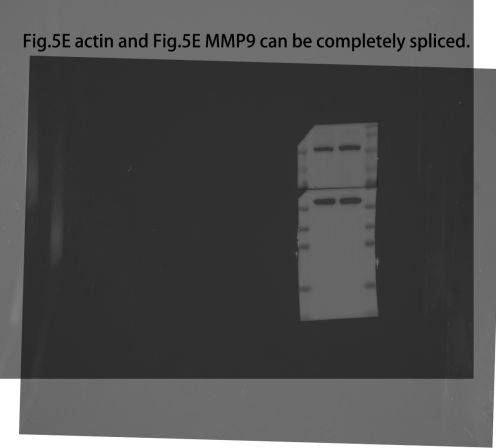 |

Fig.5G

| PAI-1 | β-actin | The markers of the two images can completely coincide and prove to be the same image. |
| --- | --- | --- |
| 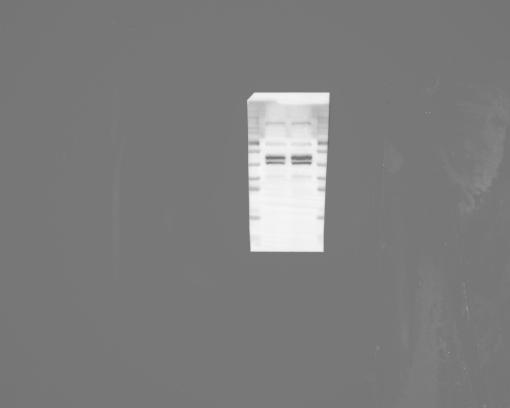 | 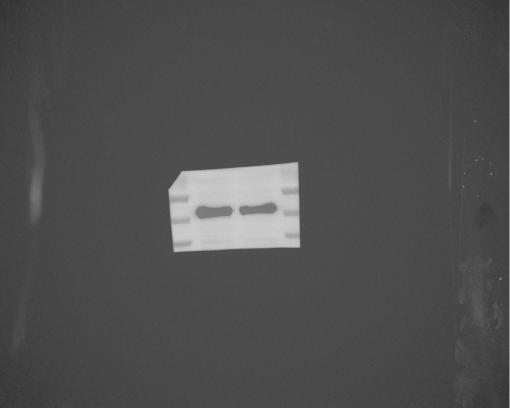 | 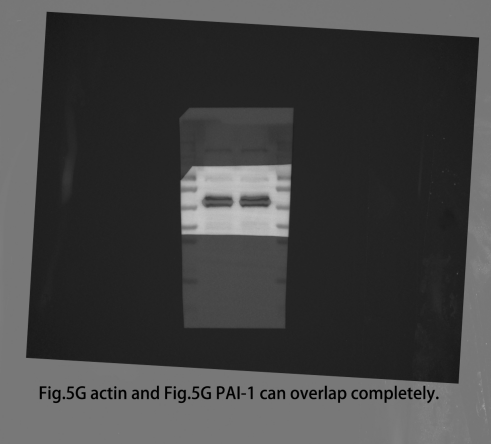 |

Fig.5H

| tPA-PAI-1 | β-actin | The markers of the two images can completely coincide and prove to be the same image. |
| --- | --- | --- |
| 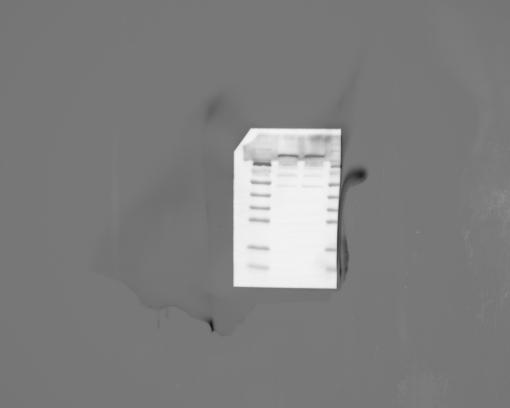 | 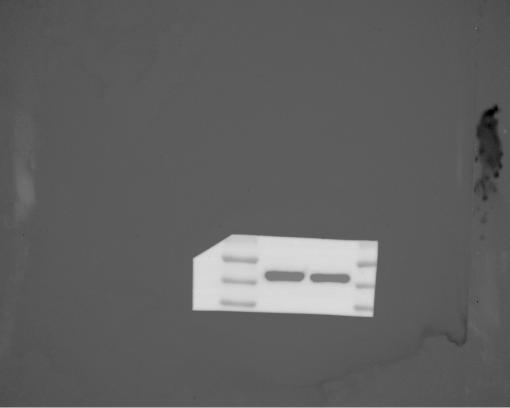 | 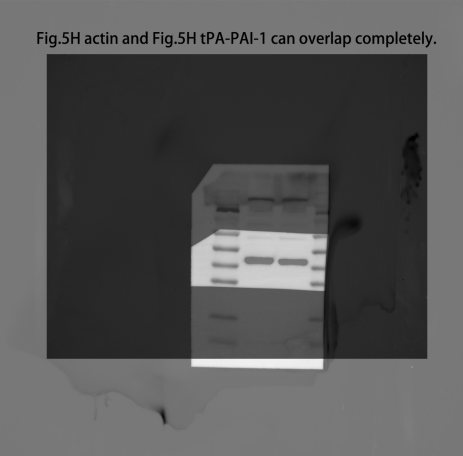 |

Fig.6H

| p53 | β-actin | The markers of the two images can completely coincide and prove to be the same image. |
| --- | --- | --- |
| 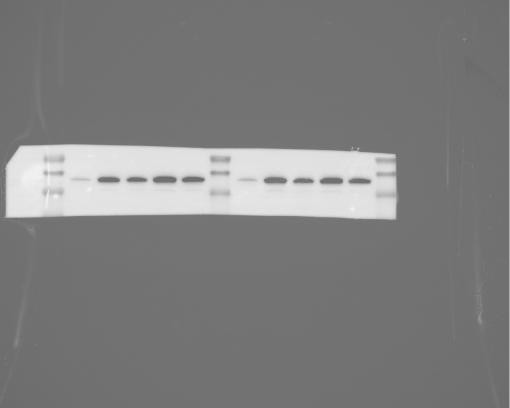 | 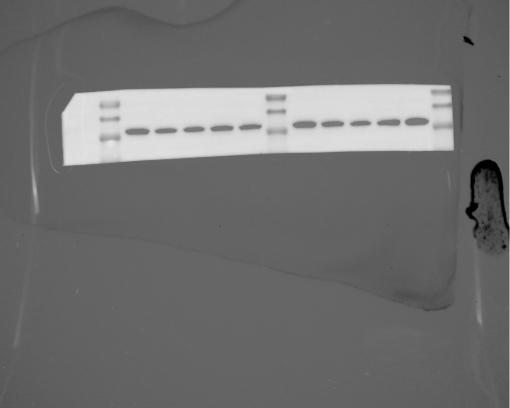 | 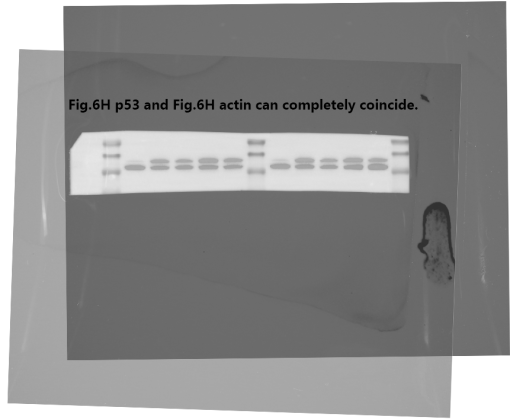 |

Fig.6I

| p21 | β-actin | The two images can completely coincide and prove to be the same images. | The overall image of the bright field |
| --- | --- | --- | --- |
| 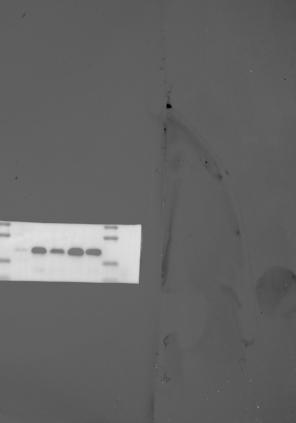 | 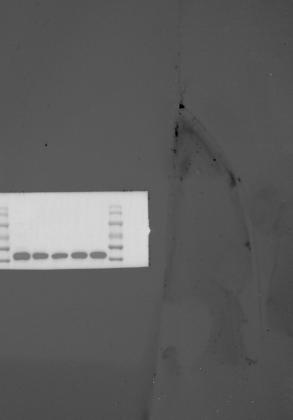 | 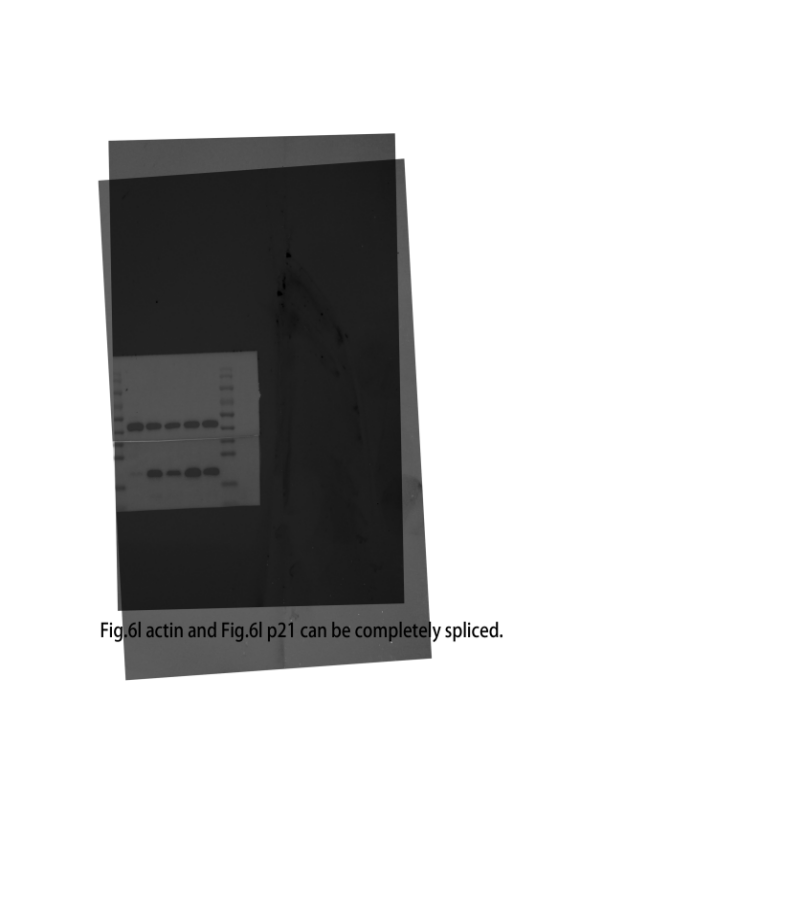 | 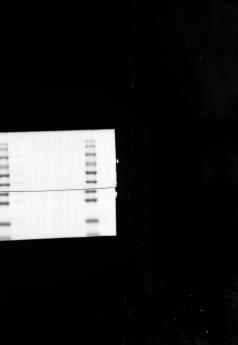 |

Fig.6J

| bax | bcl2 | The markers of the two images can completely coincide and prove to be the same image. |
| --- | --- | --- |
| 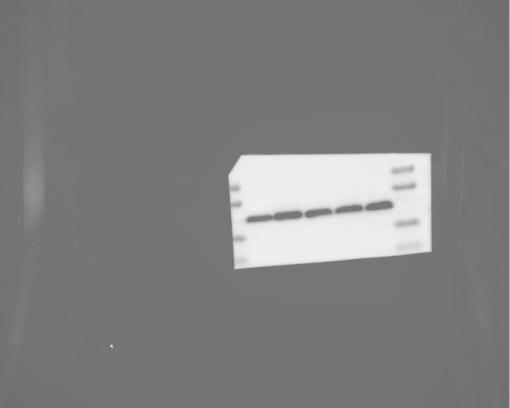 | 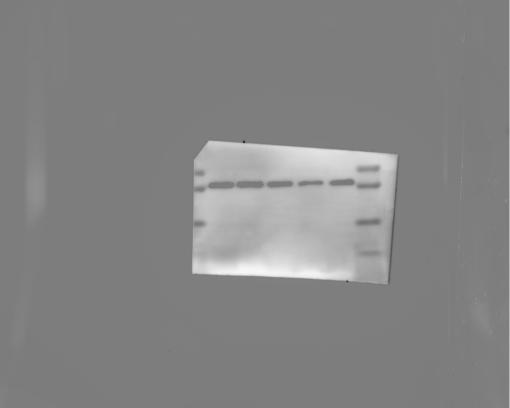 | 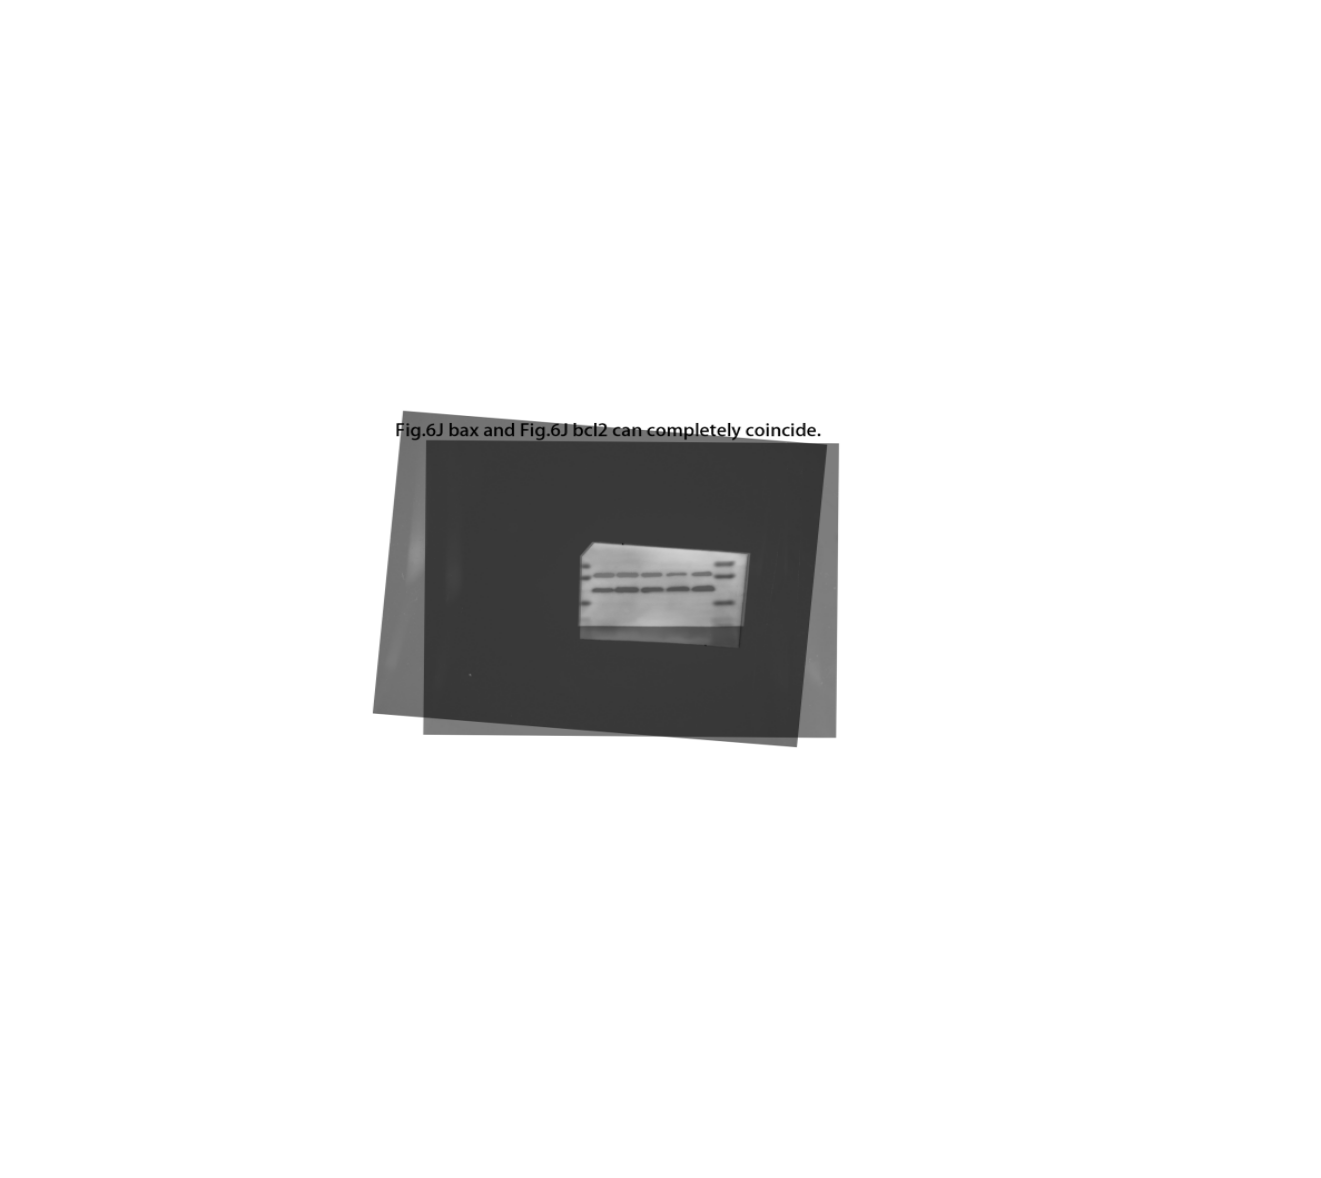 |

Fig.6K

| proBDNF | mBDNF | The markers of the two images can completely coincide and prove to be the same image. |
| --- | --- | --- |
| 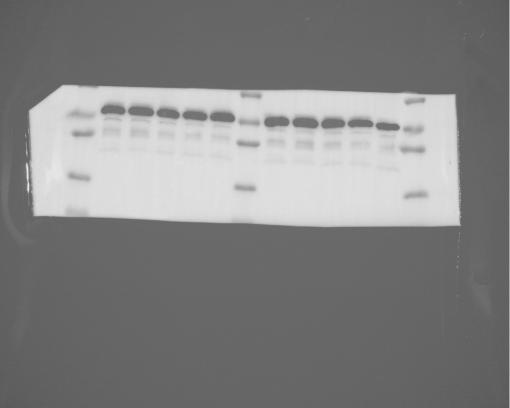 | 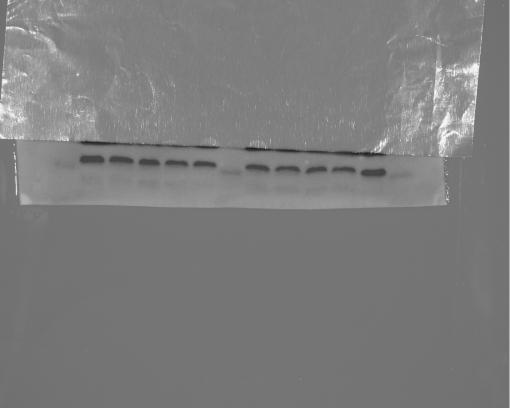 | 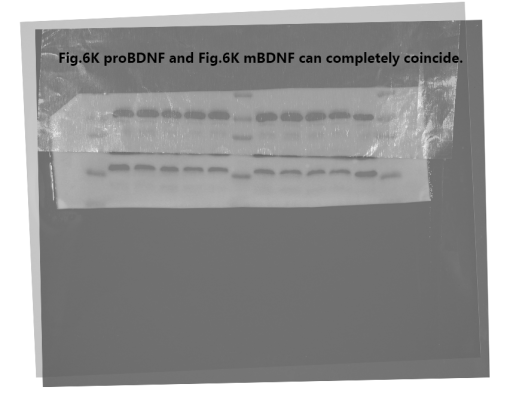 |

Fig.6L

| tPA | β-actin | The markers of the two images can completely coincide and prove to be the same image. |
| --- | --- | --- |
| 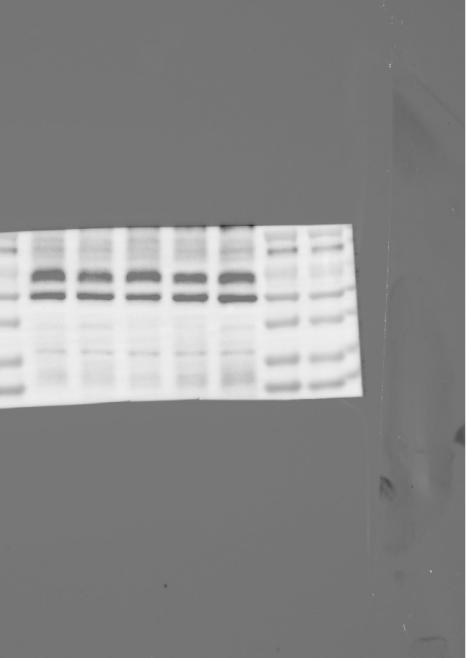 | 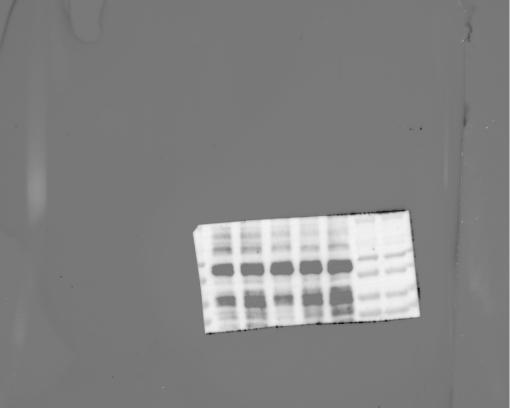 | 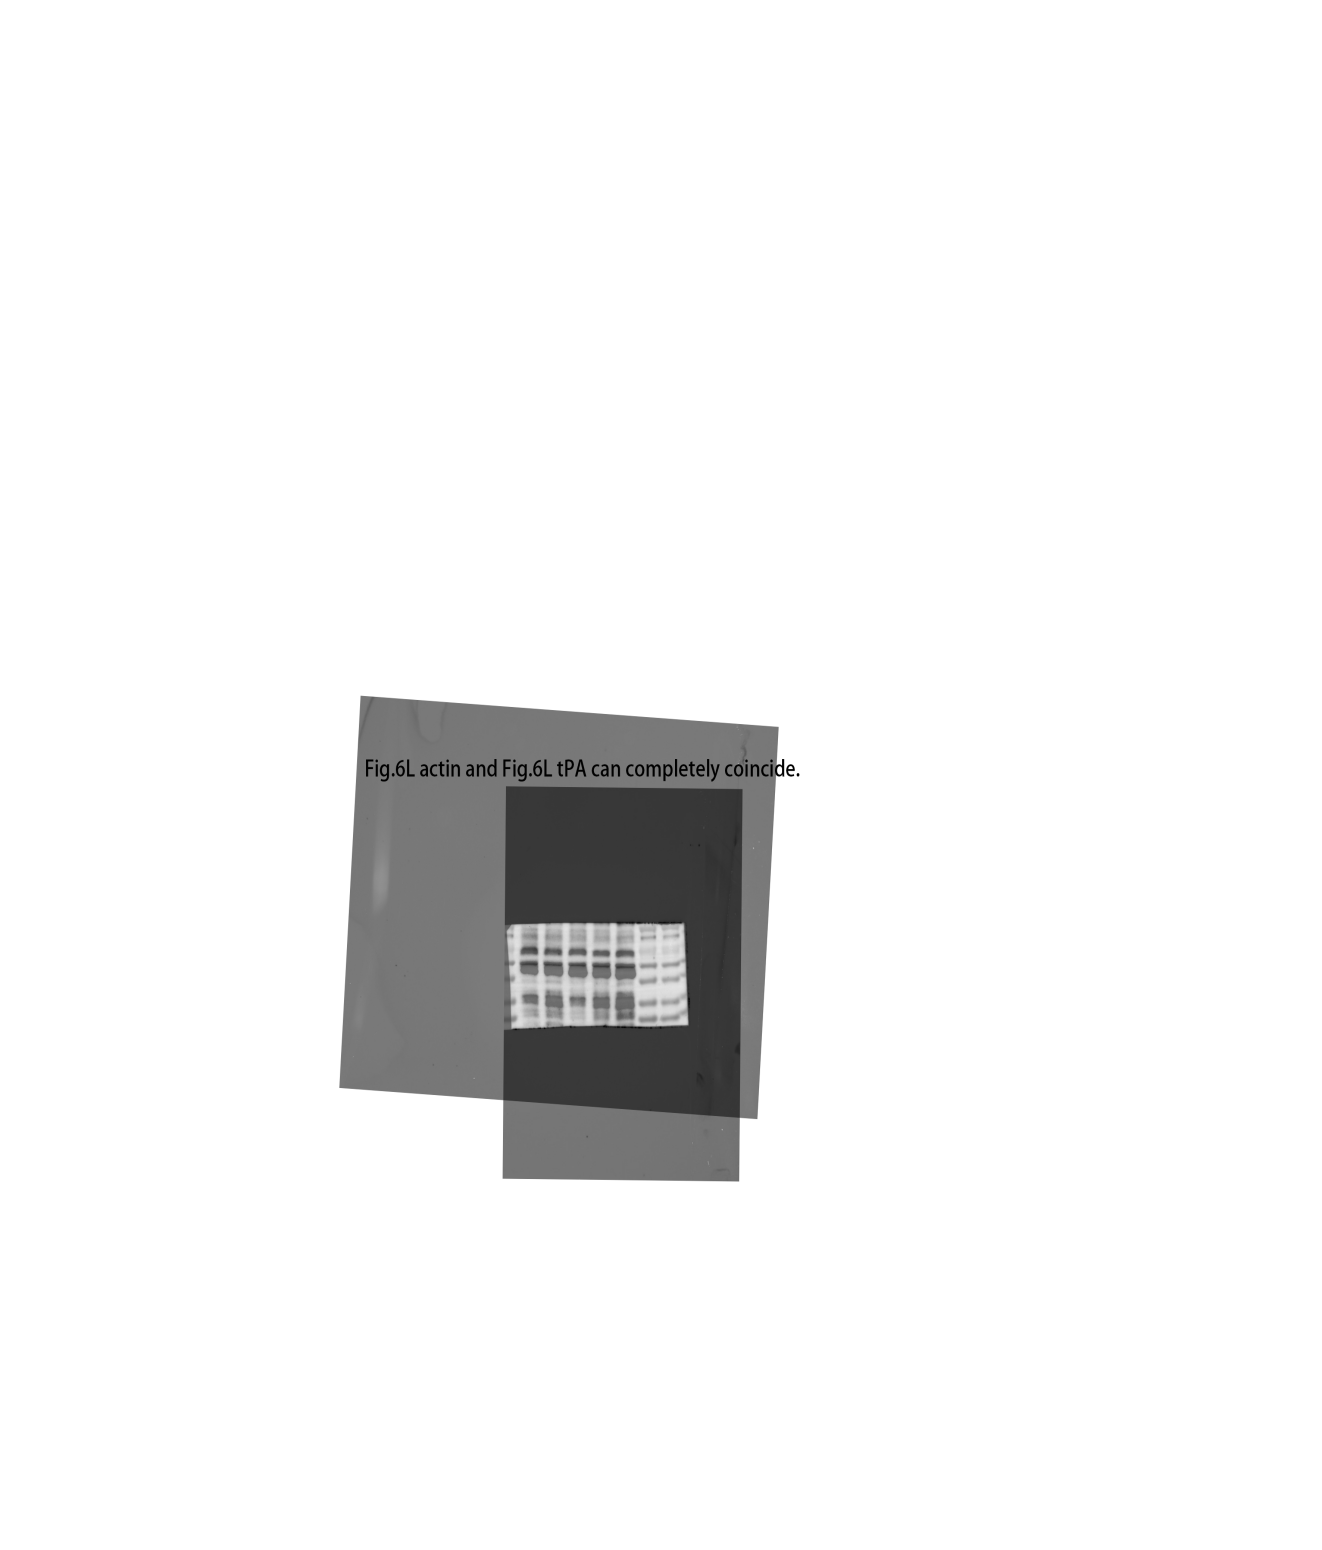 |

Fig.6M

| PAI-1 | β-actin | The markers of the two images can completely coincide and prove to be the same image. |
| --- | --- | --- |
| 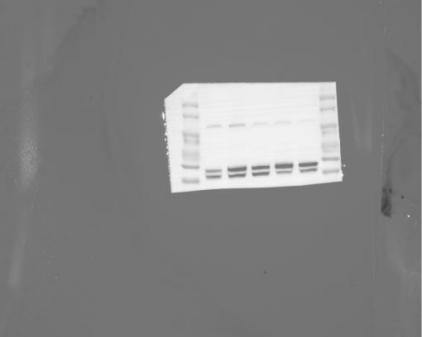 | 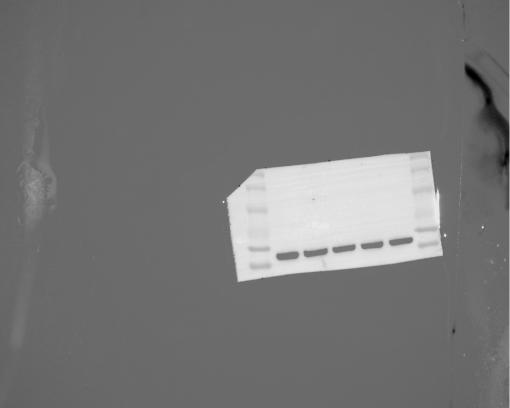 | 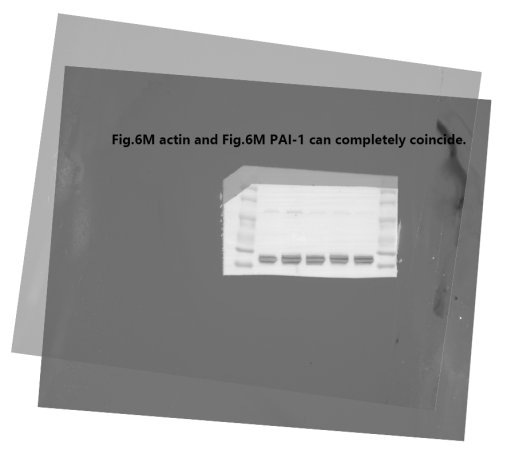 |

Fig.6N

| tPA-PAI-1 | β-actin | The two images can completely coincide and prove to be the same images. | The overall image of the bright field |
| --- | --- | --- | --- |
| 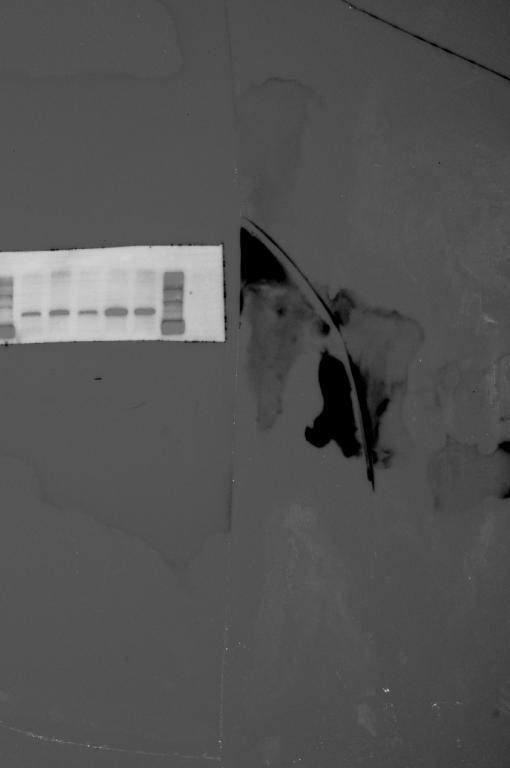 | 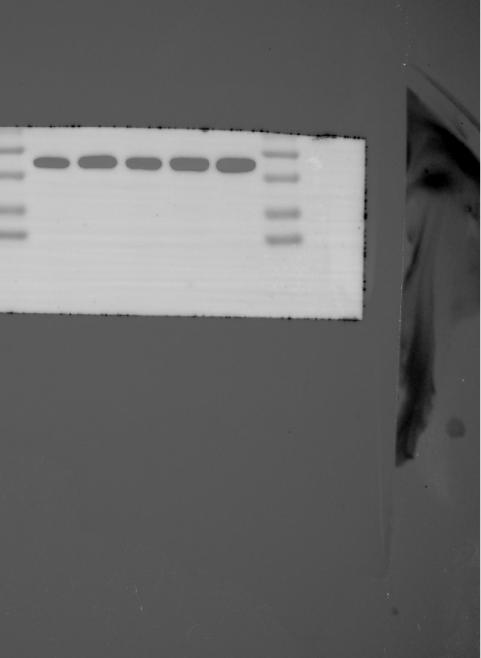 | 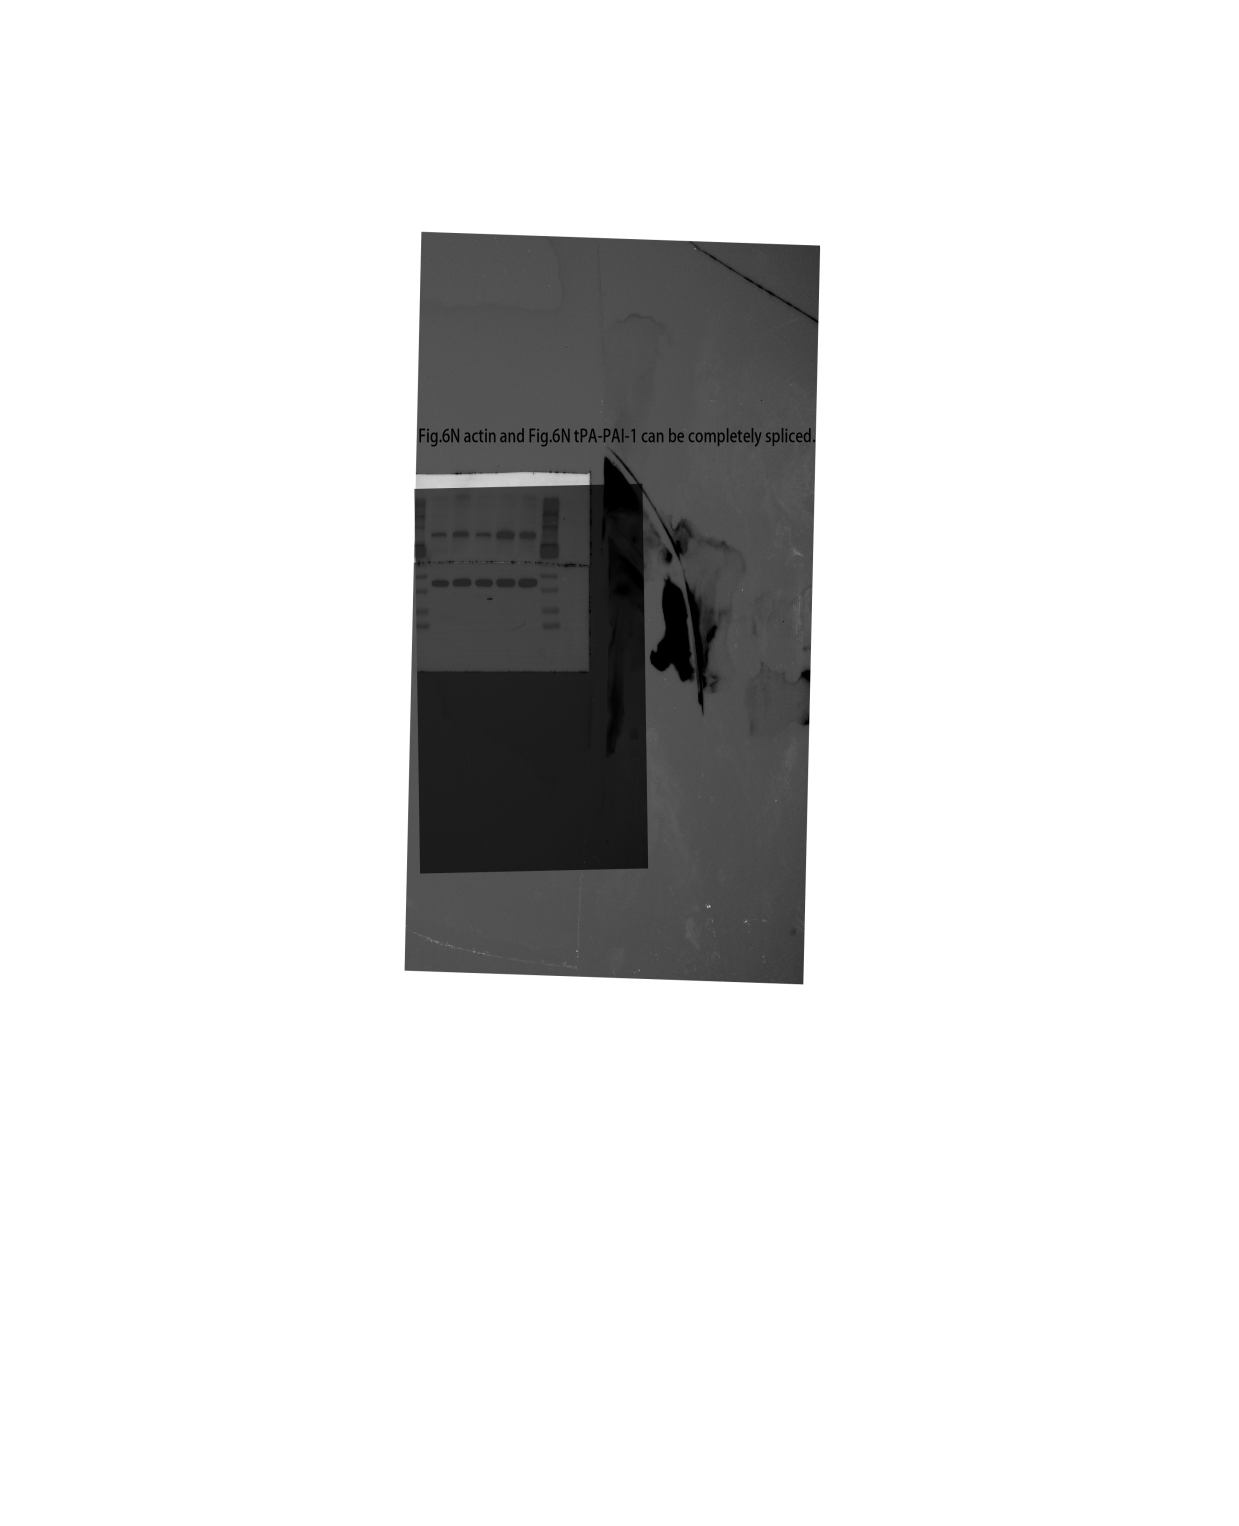 | 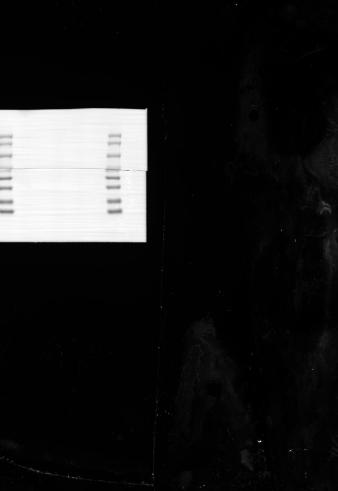 |

Fig.6O

| tPA | β-actin | The markers of the two images can completely coincide and prove to be the same image. |
| --- | --- | --- |
| 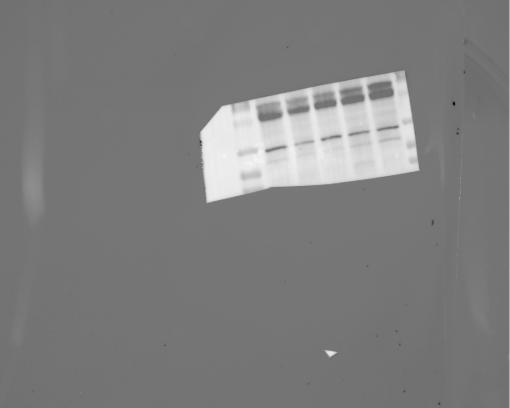 | 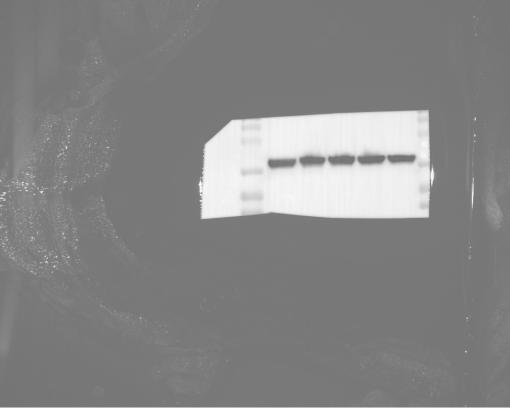 | 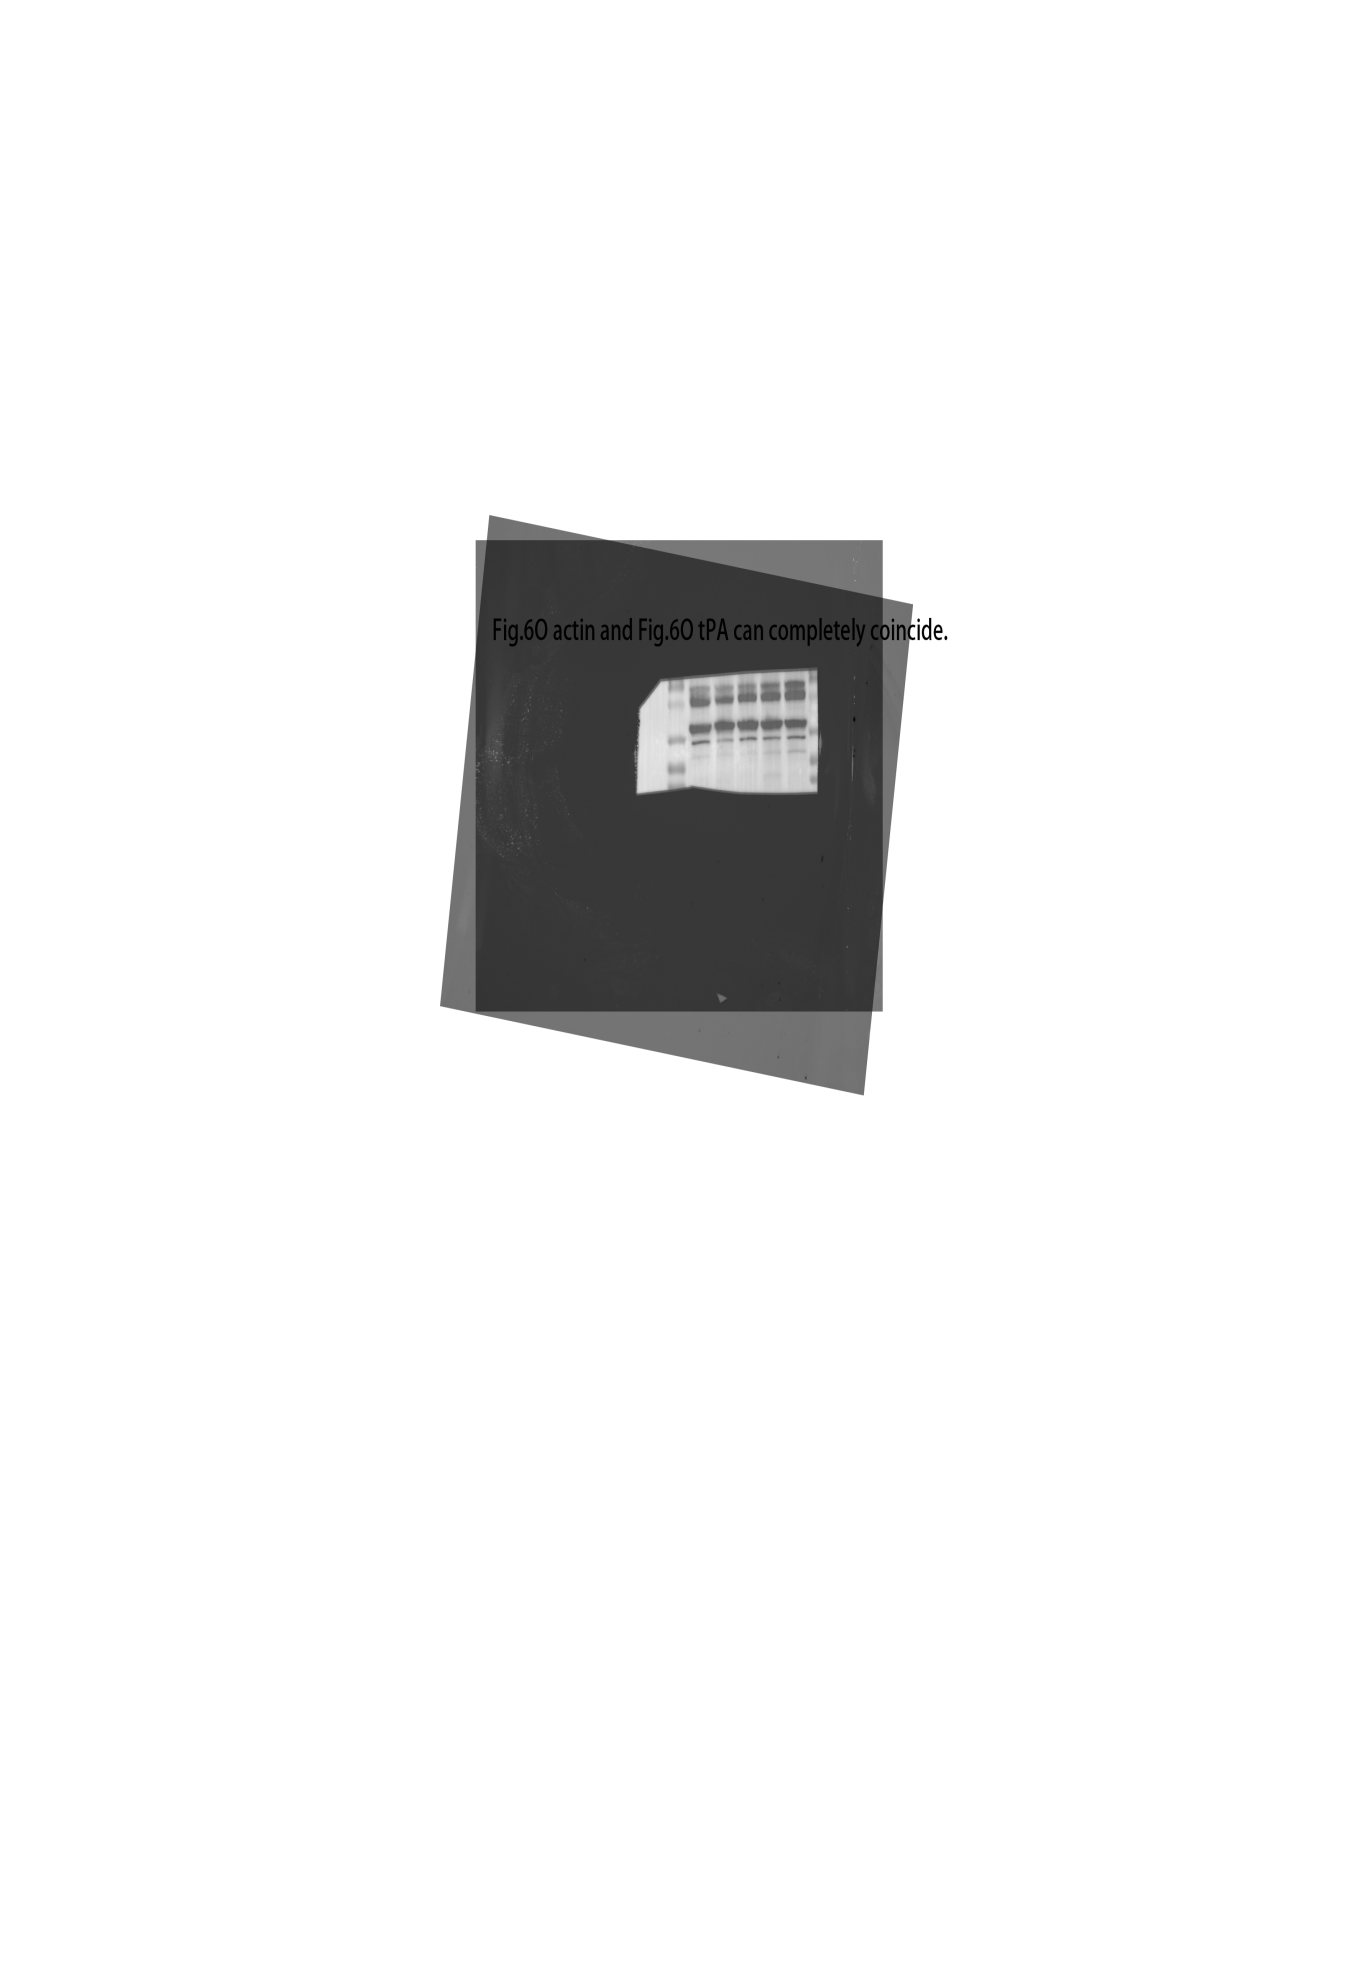 |

Fig.6P

| PAI-1 | β-actin | The markers of the two images can completely coincide and prove to be the same image. |
| --- | --- | --- |
| 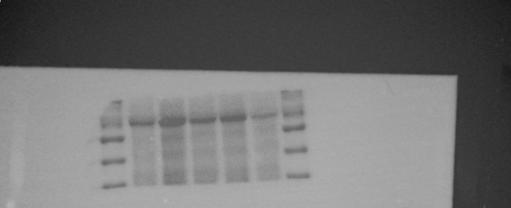 | 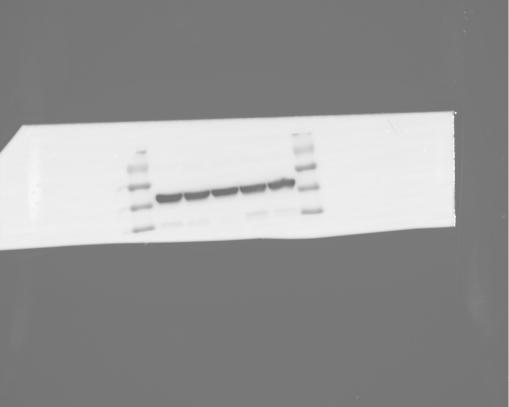 | 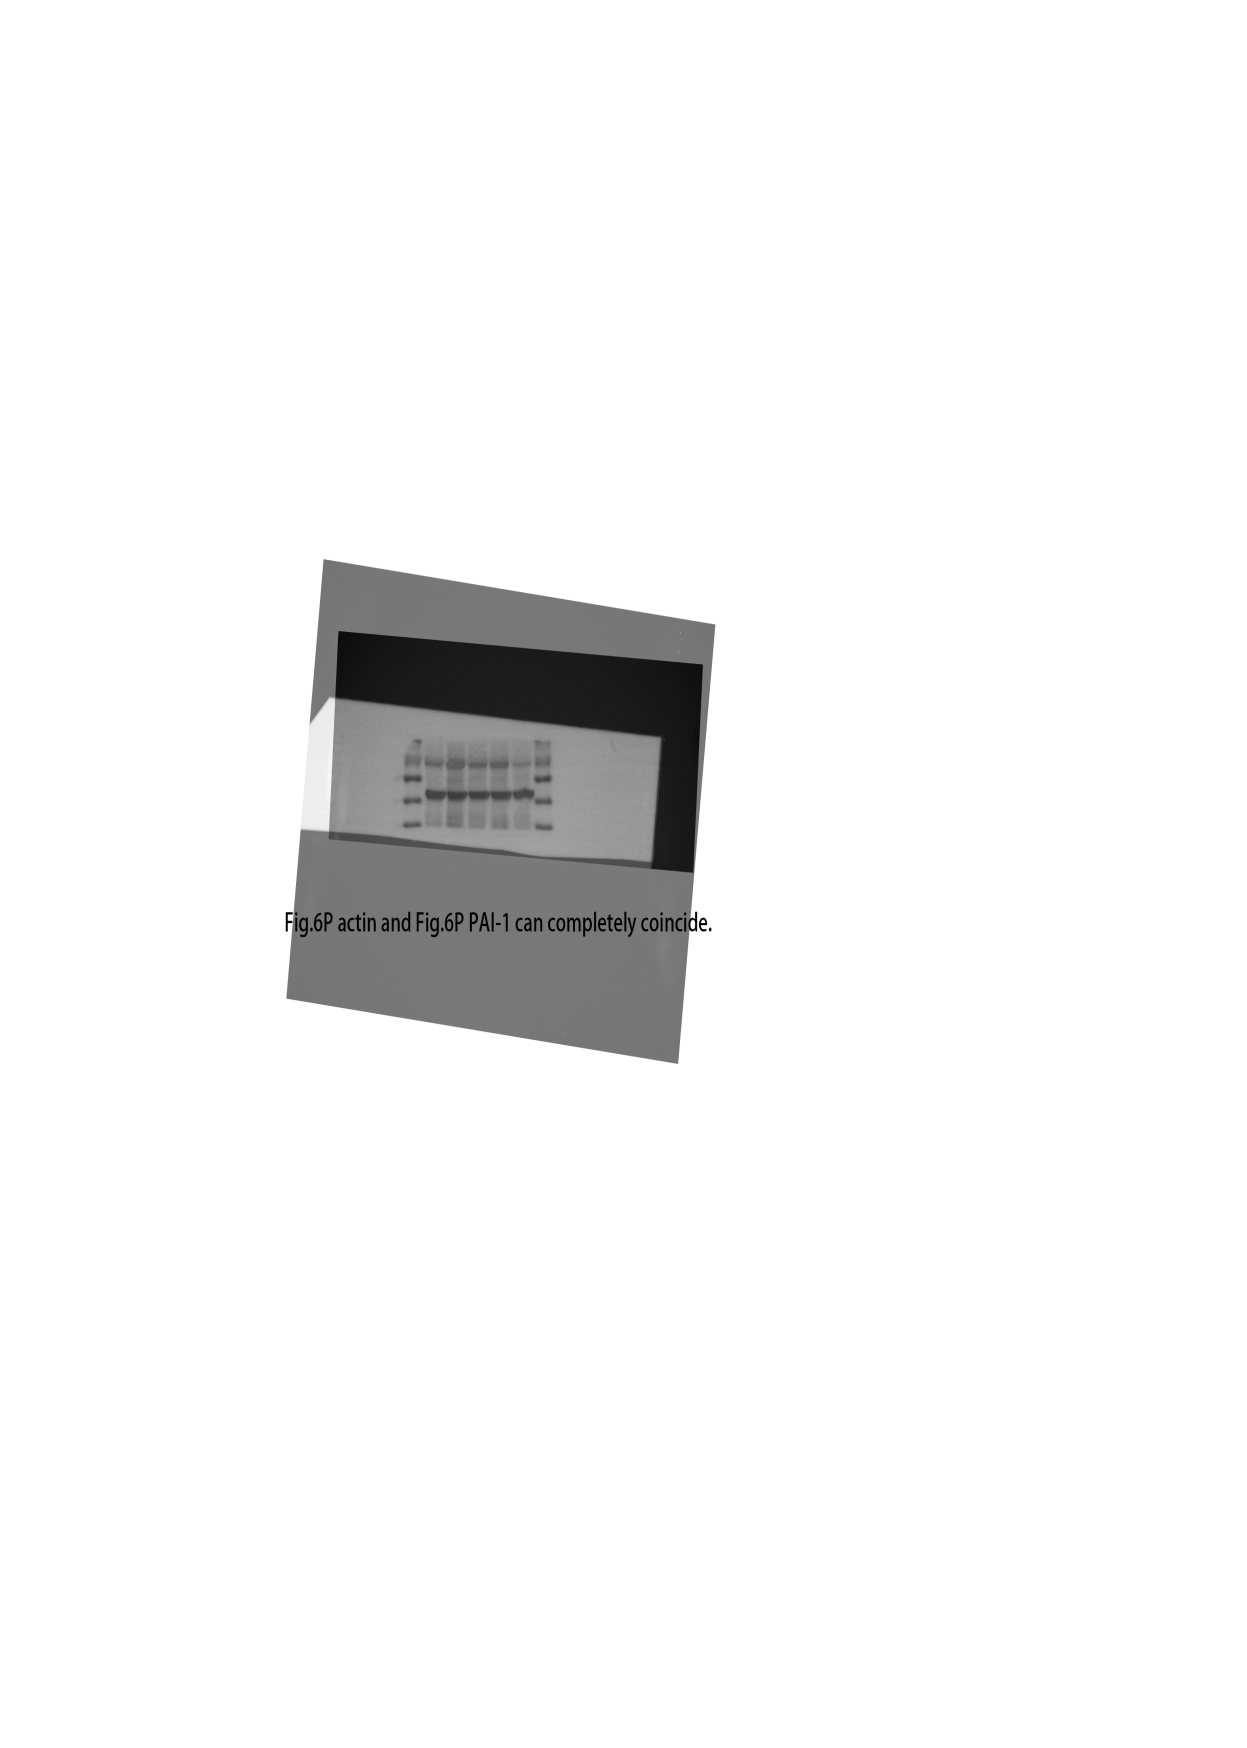 |

Fig.6Q

| tPA-PAI-1 | β-actin | The markers of the two images can completely coincide and prove to be the same image. | The overall image of the bright field |
| --- | --- | --- | --- |
| 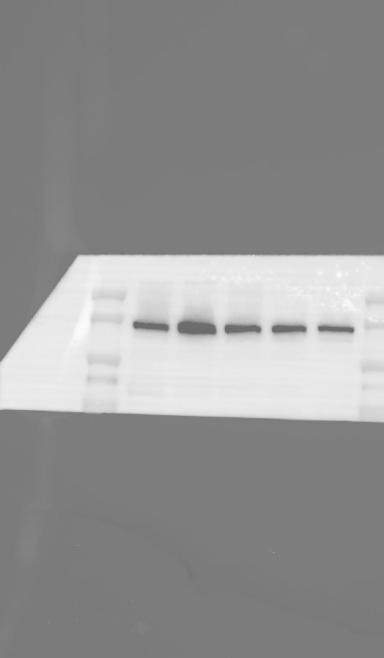 | 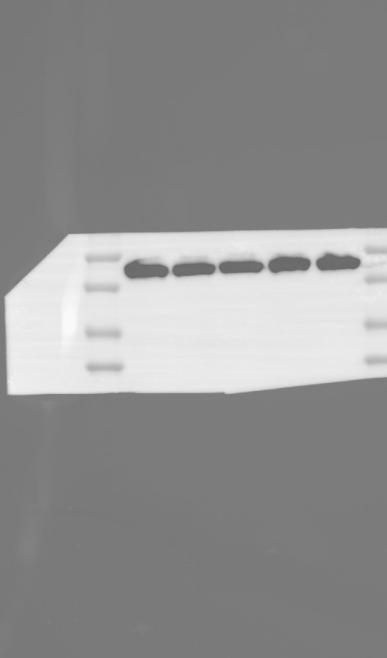 | 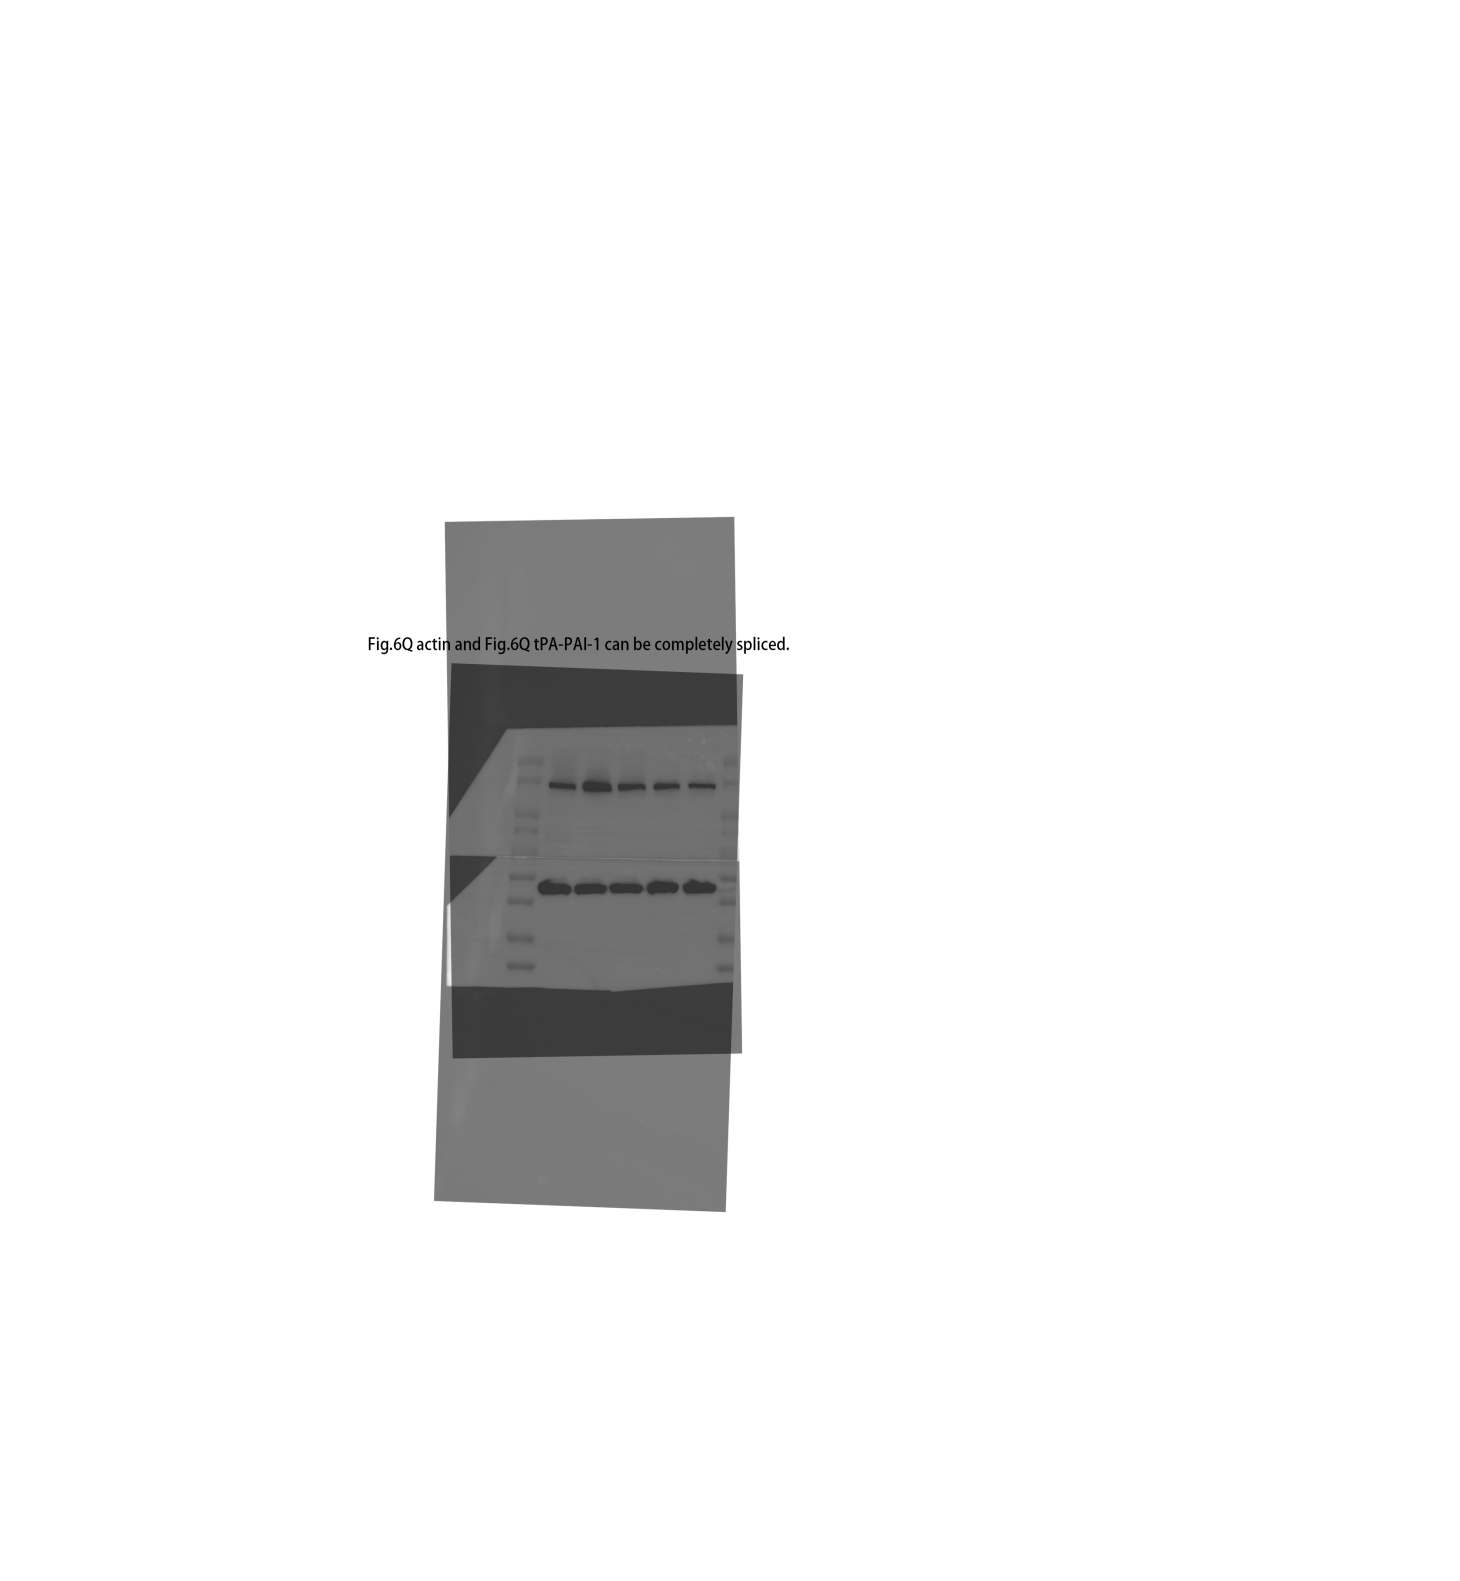 | 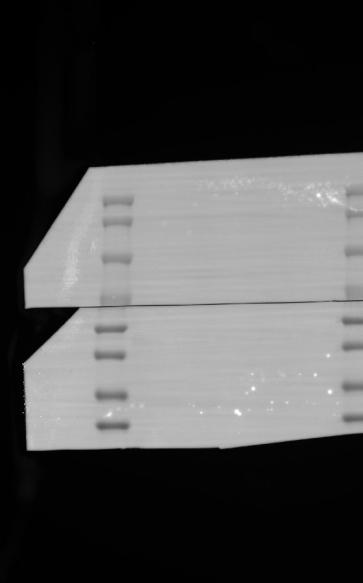 |
