# Supplementary material for: The mechanism of Ningxin-Tongyu-Zishen formula regulating proBDNF/mBDNF balance through PAI-1/tPA signaling pathway in the treatment of premature ovarian insufficiency
Source: Research Square preprint supplement (doi:10.21203/rs.3.rs-6810873/v1), 2025-06-19
Supplement: Supplementary file 2 [file b2deaf3f386b89a79cf116da.docx]

| 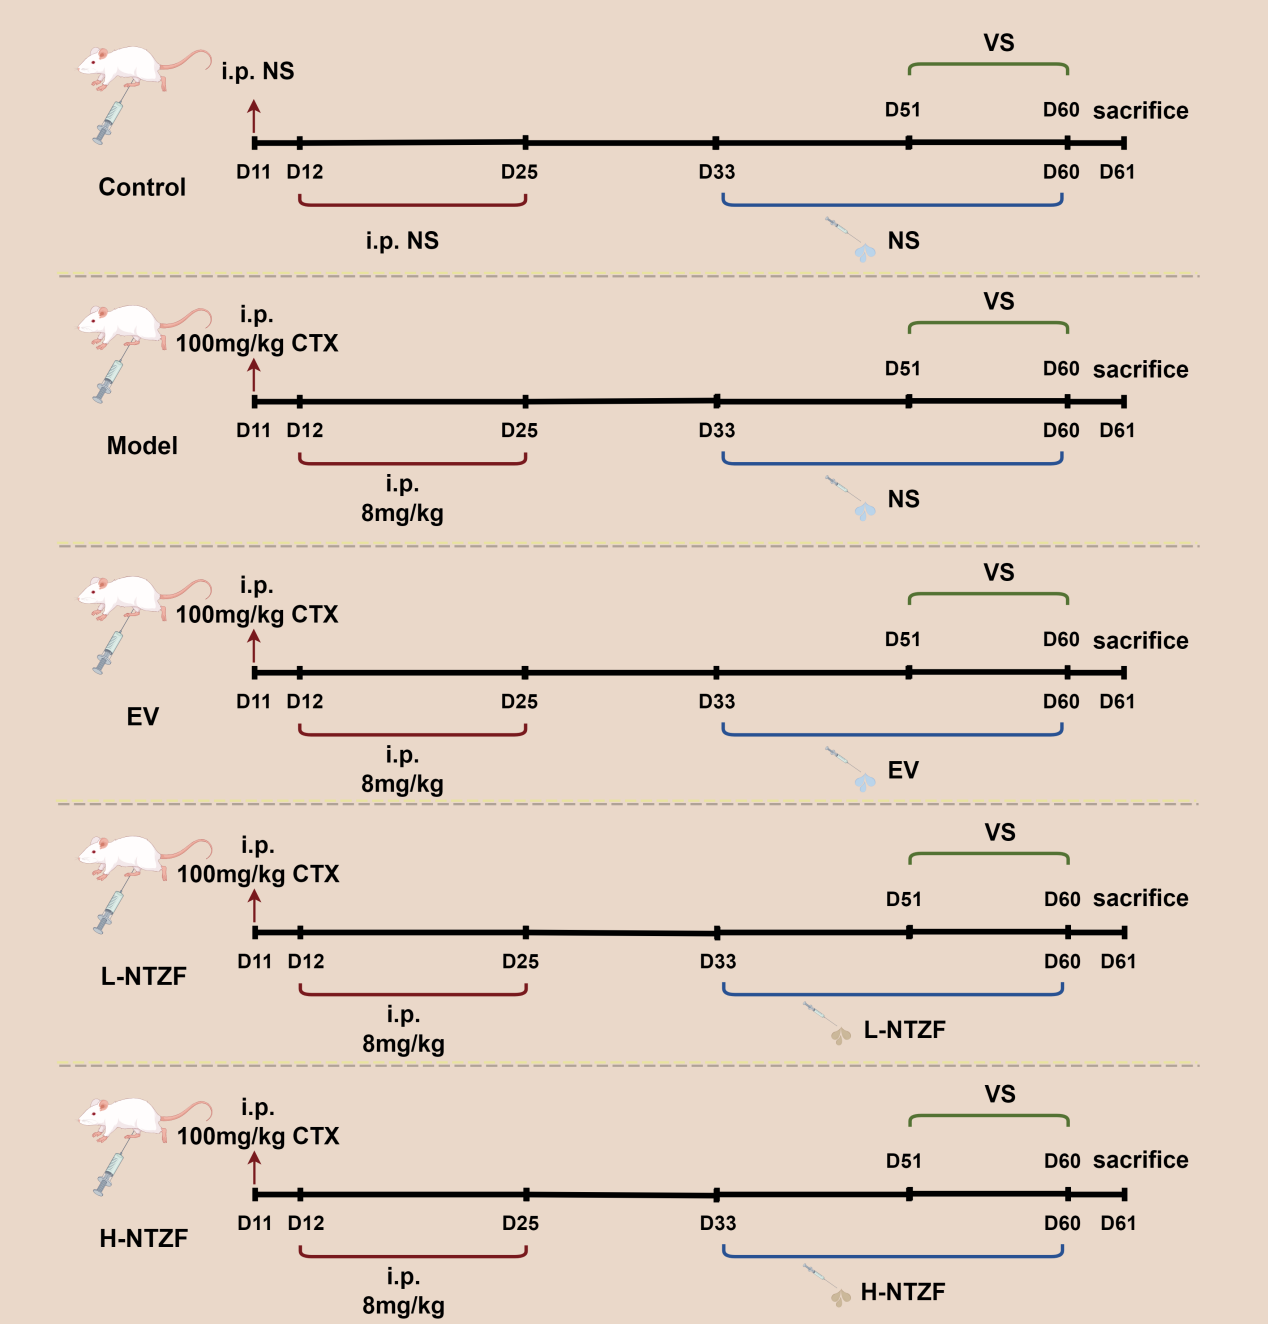 |
| --- |
| Supplementary Fig.1 The animal experimental protocol. |

Supplementary Table1 Primary antibodies for IF.

| **Gene** | **Dilution ratio** | **Producer** | **Product number** | **Flare** | **Application** |
| --- | --- | --- | --- | --- | --- |
| TrkB | 1:200 | Proteintech | 13129-1-AP | 620 | ovarian tissues |
| P75NTR | 1:250 | Proteintech | 55014-1-AP | 520 | ovarian tissues |
| TrkB | 1:100 | Proteintech | 13129-1-AP | 570 | KGN cells |
| P75NTR | 1:125 | Proteintech | 55014-1-AP | 520 | KGN cells |

Supplementary Table2 Primer sequences.

| **Gene** | **Primer sequences** | **Length(bp)** |
| --- | --- | --- |
| p53 | F：5'-TTCCTGAAAACAACGTTCTGTC-3’ | 85 |
| R：5'-AACCATTGTTCAATATCGTCCG-3’ | 85 |
| p21 | F：5'-TCAAATCGTCCAGCGACCTTC-3’ | 125 |
| R：5'-CATGCCCTGTCCATAGCCTCTAC-3’ | 125 |
| bax | F：5'-CGAACTGGACAGTAACATGGAG-3’ | 157 |
| R：5'-CAGTTTGCTGGCAAAGTAGAAA-3’ | 157 |
| bcl2 | F：5'-GACTTCGCCGAGATGTCCAG-3’ | 129 |
| R：5'-GAACTCAAAGAAGGCCACAATC-3’ | 129 |
| BDNF | F：5'-GACACTTTCGAACACGTGATAG-3’ | 89 |
| R：5'-TACAAGTCTGCGTCCTTATTGT-3’ | 89 |
| p75NTR | F：5'-CATCCCTGTCTATTGCTCCATC-3’ | 151 |
| R：5'-GAGTTTTTCTCCCTCTGGTGG-3’ | 151 |
| TrkB | F：5'- ACCCGAAACAAACTGACGAGT-3’ | 84 |
| R：5'-AAATGGATTGCCCACCAGGA-3’ | 84 |
| Furin | F：5'-GACTTGGCAGGCAATTATGATC-3’ | 96 |
| R：5'-CCTGTTGTCATTCATCTGTGTG-3’ | 96 |
| tPA | F：5'-TCTATTCGGAGCGGCTGAAGGAG-3’ | 100 |
| R：5'-AGCATGTTGTCGGTGACTGTTCTG-3’ | 100 |
| MMP2 | F：5'- ATTGTATTTGATGGCATCGCTC-3’ | 202 |
| R：5'-ATTCATTCCCTGCAAAGAACAC-3’ | 202 |
| MMP9 | F：5'-CCTTGTGCTCTTCCCTGGAG-3’ | 89 |
| R：5'-CCCGAGTGTAACCATAGCGG-3’ | 89 |
| PAI-1 | F：5'-CAGAGGTGGAGAGAGCCAGA-3’ | 140 |
| R：5'-GCCGTTGAAGTAGAGGGCAT-3’ | 140 |
| β-actin | F：5'-CCTGGCACCCAGCACAAT-3’ | 144 |
| R：5'-GGGCCGGACTCGTCATAC-3’ | 144 |

Supplementary Table3 Antibodies for western blot.

| **Antibody information** | **Dilution ratio** | **Producer** | **Product number** |
| --- | --- | --- | --- |
| BDNF | 1:1000 | Abcam | ab108319 |
| p53 | 1:5000 | Proteintech | 10442-1-AP |
| p21 | 1:1000 | Proteintech | 10355-1-AP |
| bax | 1:5000 | Proteintech | 50599-2-lg |
| bcl2 | 1:1000 | Proteintech | 12789-1-AP |
| p75NTR | 1:1000 | Proteintech | 55014-1-AP |
| TrkB | 1:1000 | Proteintech | 13129-1-AP |
| Furin | 1:500 | Bioss | bsm-54283R |
| tPA | 1:1000 | Proteintech | 10147-1-AP |
| MMP2 | 1:500 | Proteintech | 10373-2-AP |
| MMP9 | 1:500 | Proteintech | 10375-2-AP |
| PAI-1 | 1:2000 | Proteintech | 13801-1-AP |
| β-actin | 1:20000 | Proteintech | 20536-1-AP |
| Goat Anti-Rabbit lgG H&L/HRP | 1:10000 | Bioss | bs-0295G-HRP |
